# Supplementary material for: BLOS2 negatively regulates Notch signaling during neural and hematopoietic stem and progenitor cell development
Source: eLife journal article supplement (doi:10.7554/elife.18108), 2016-10-10
Supplement: supp [file elife-18108-supp-v1.zip]

Figure 3A-source data 1

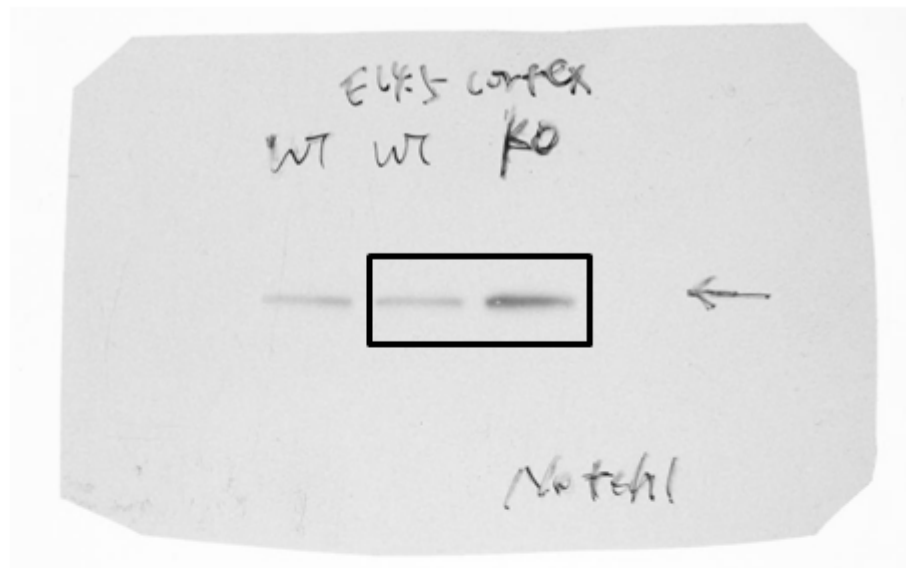

The black box shows the bands of Notch1 (N<sup>TM</sup>).

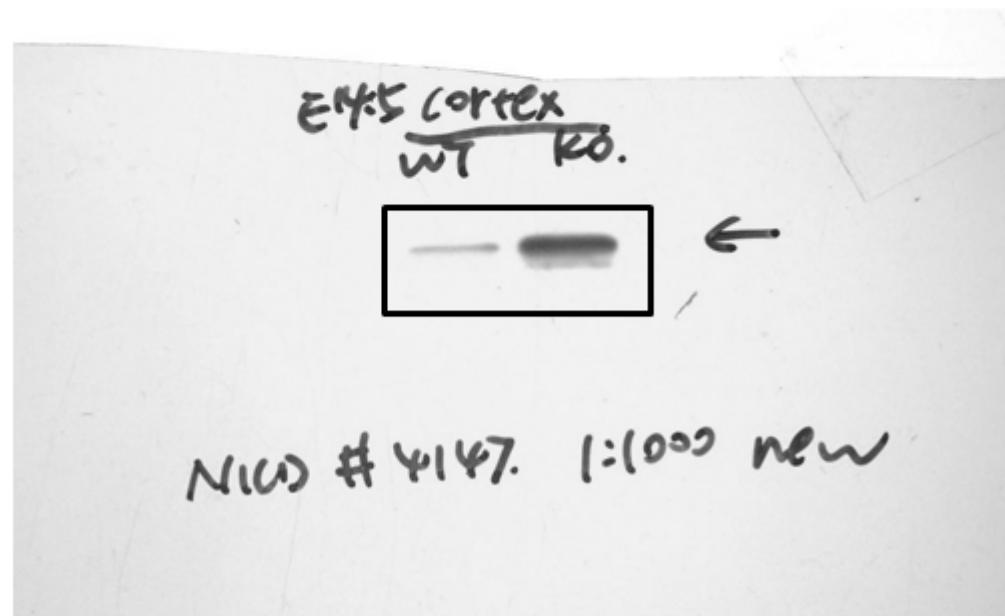

The black box shows the bands of NICD1.

Figure 3A-source data 2

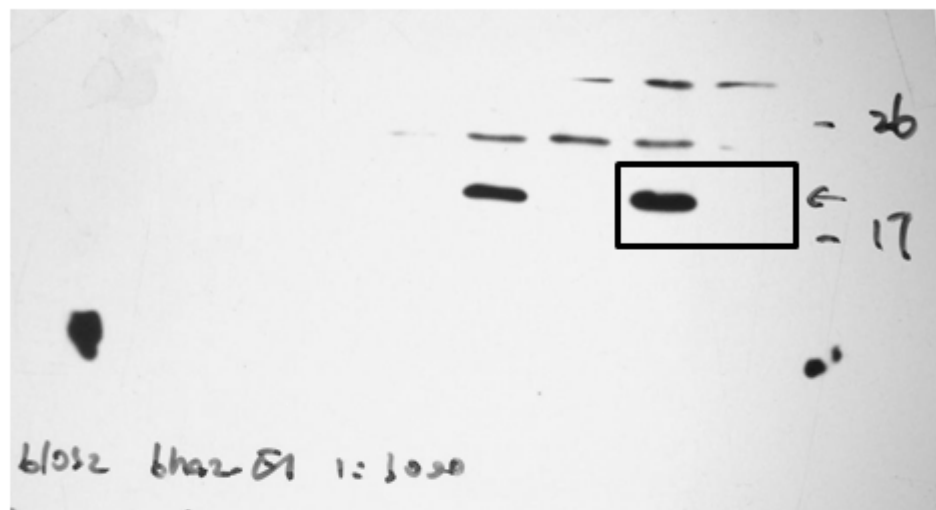

The black box shows the bands of BLOS2.

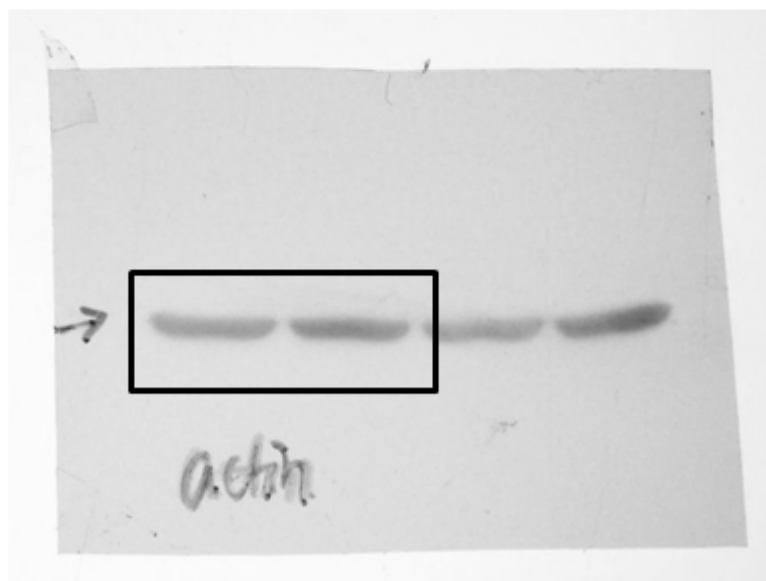

The black box shows the bands of  $\beta$ -actin.

Figure 3H-source data 1

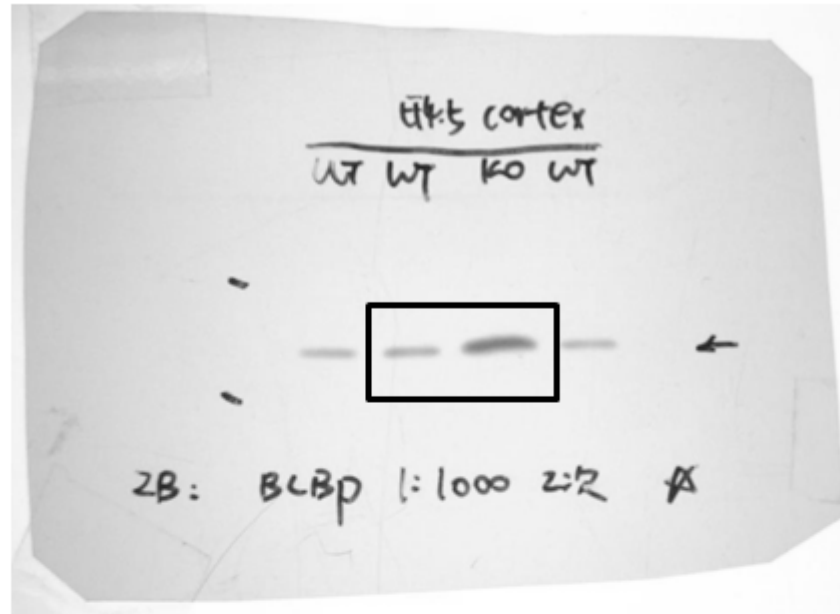

The black box shows the bands of Fabp7.

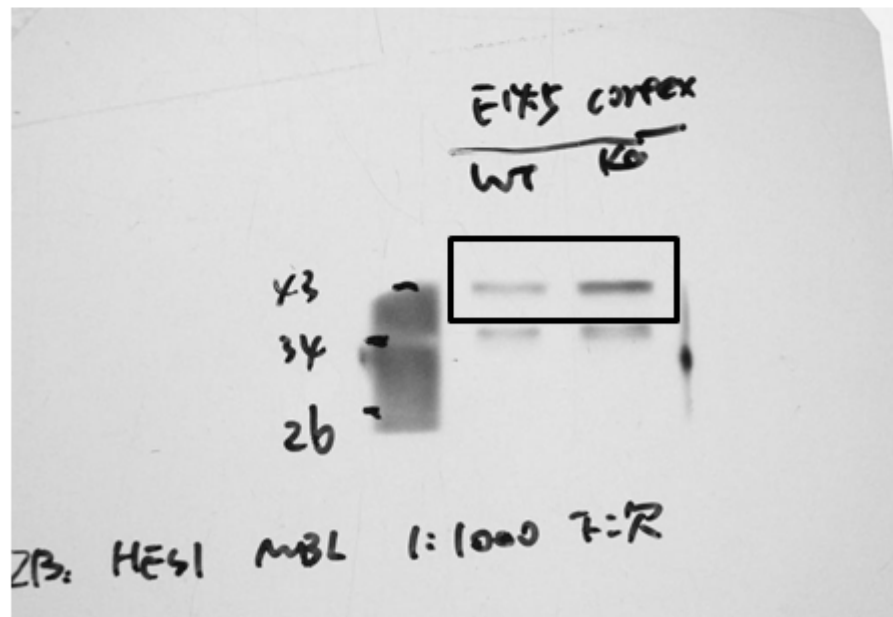

The black box shows the bands of Hes1.

Figure 3H-source data 2

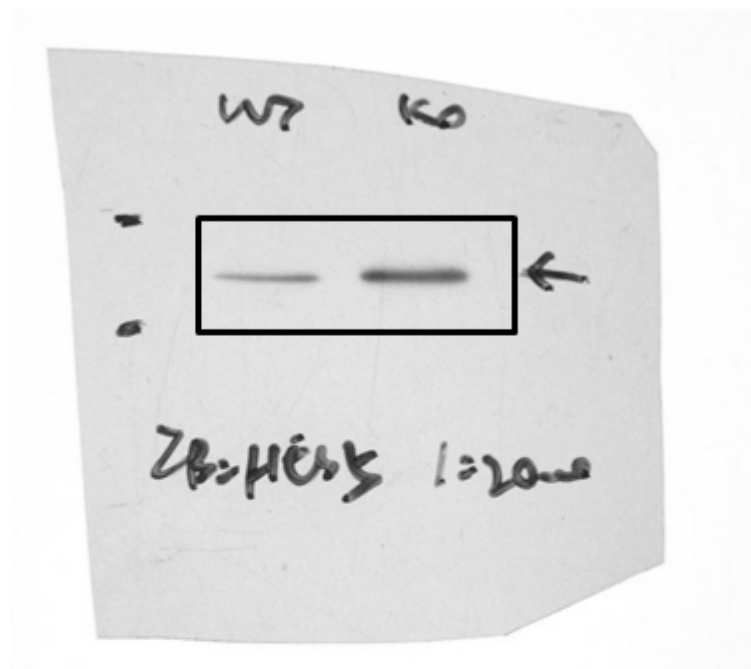

The black box shows the bands of Hes5.

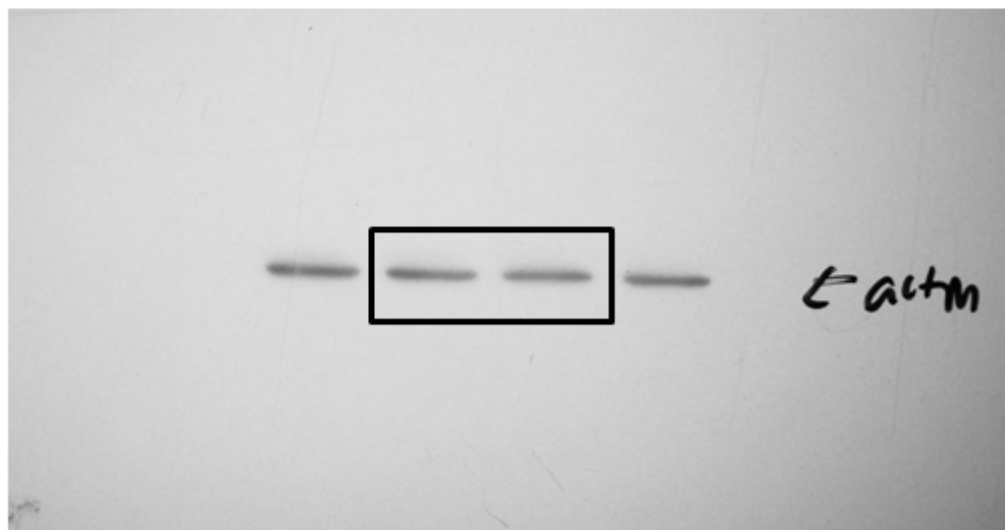

The black box shows the bands of  $\beta$ -actin.

Figure 4A-source data 1

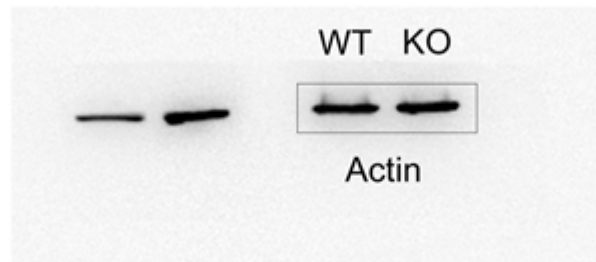

The black box shows the bands of Actin .

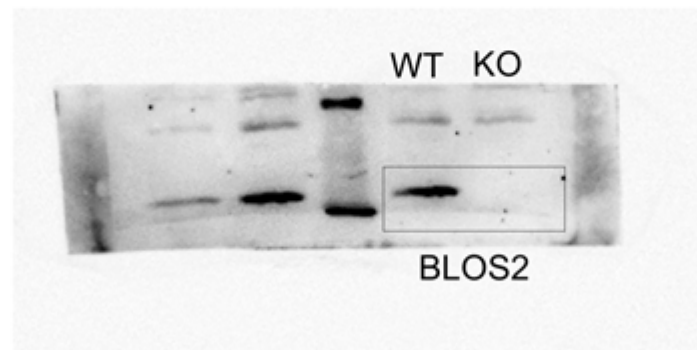

The black box shows the bands of BLOS2.

Figure 4G-source data 1

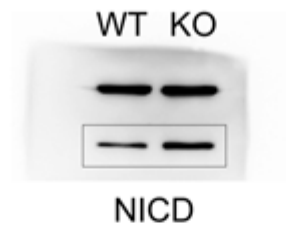

The black box shows the bands of NICD.

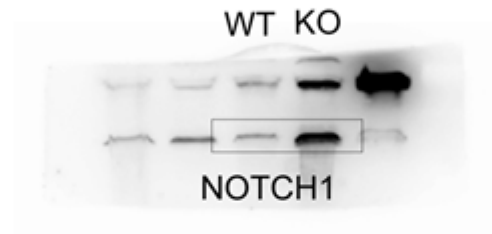

The black box shows the bands of Notch1.

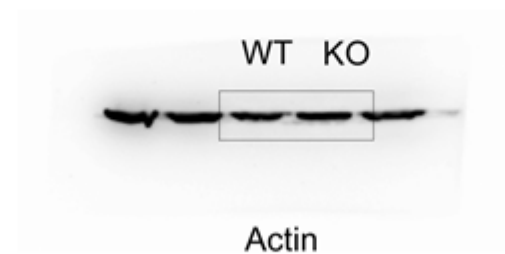

The black box shows the bands of Actin.

Figure 5C-source data 1

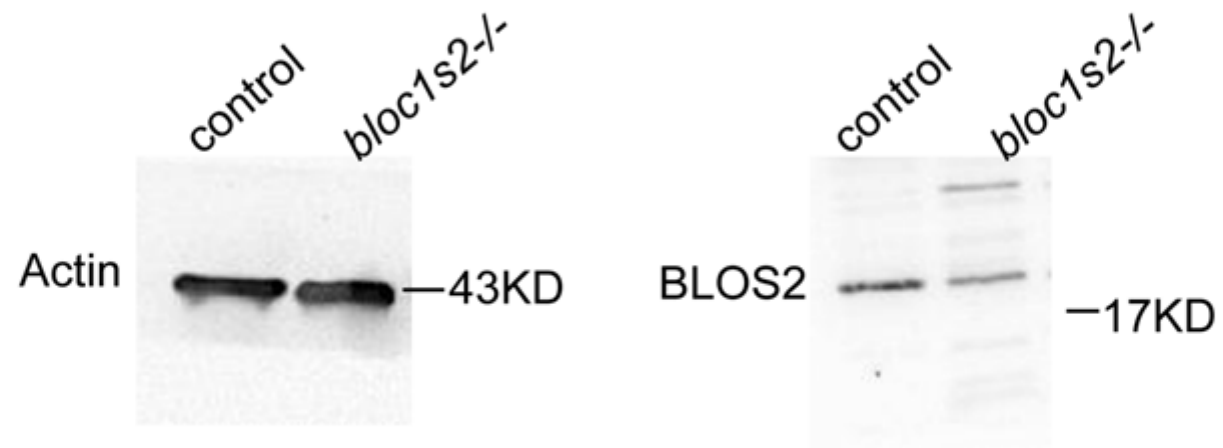

Figure 5D-source data 1

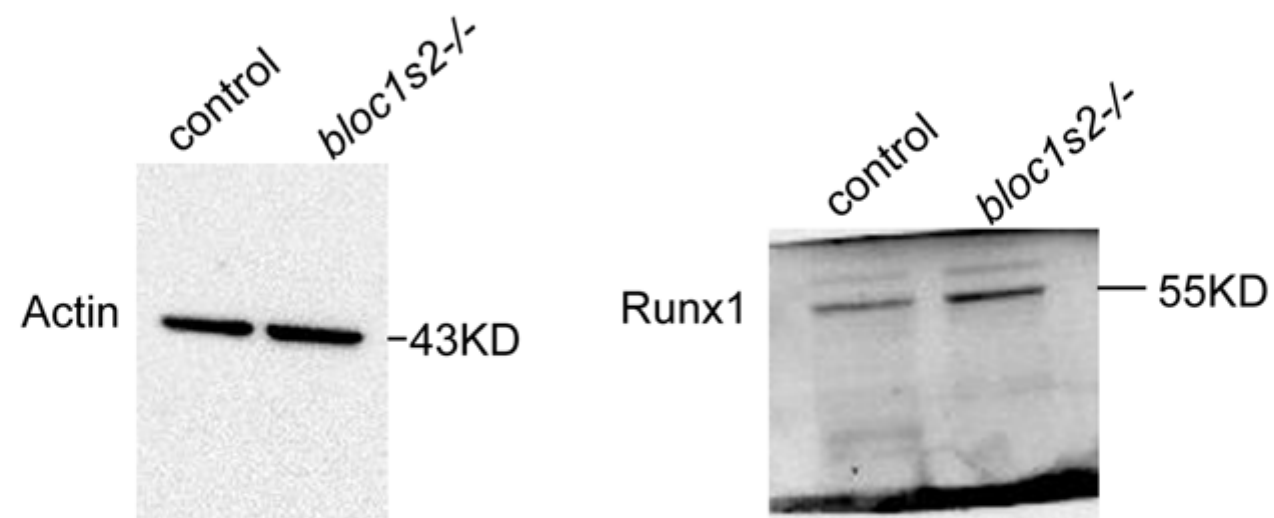



Figure 6B-source data 1

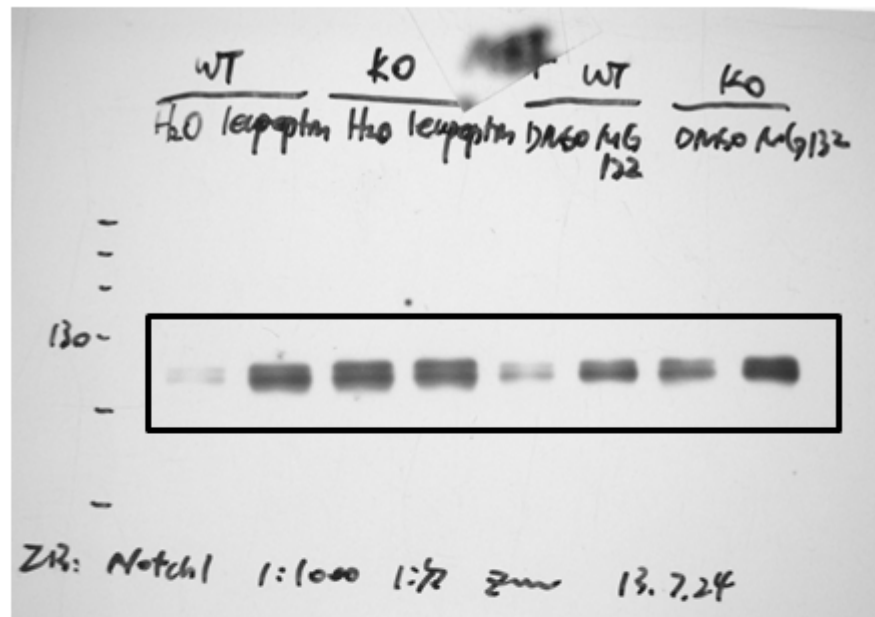

The black box shows the bands of Notch1 (N<sup>TM</sup>).

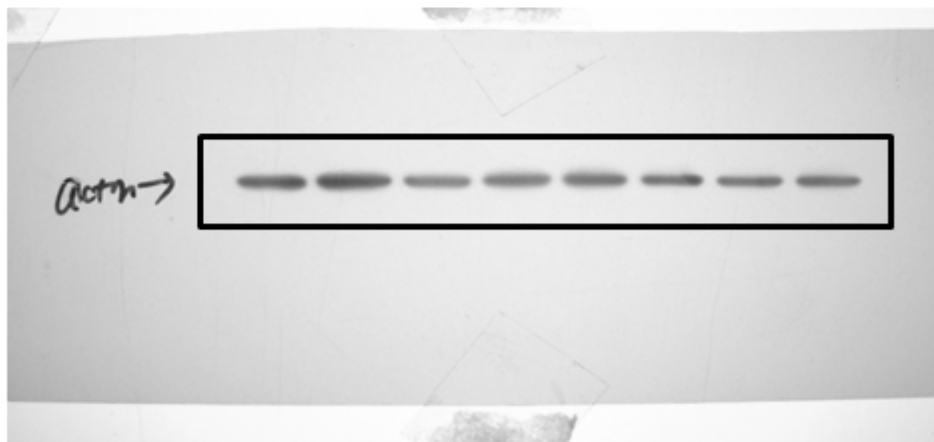

The black box shows the bands of  $\beta$ -actin.

Figure 6E-source data 1

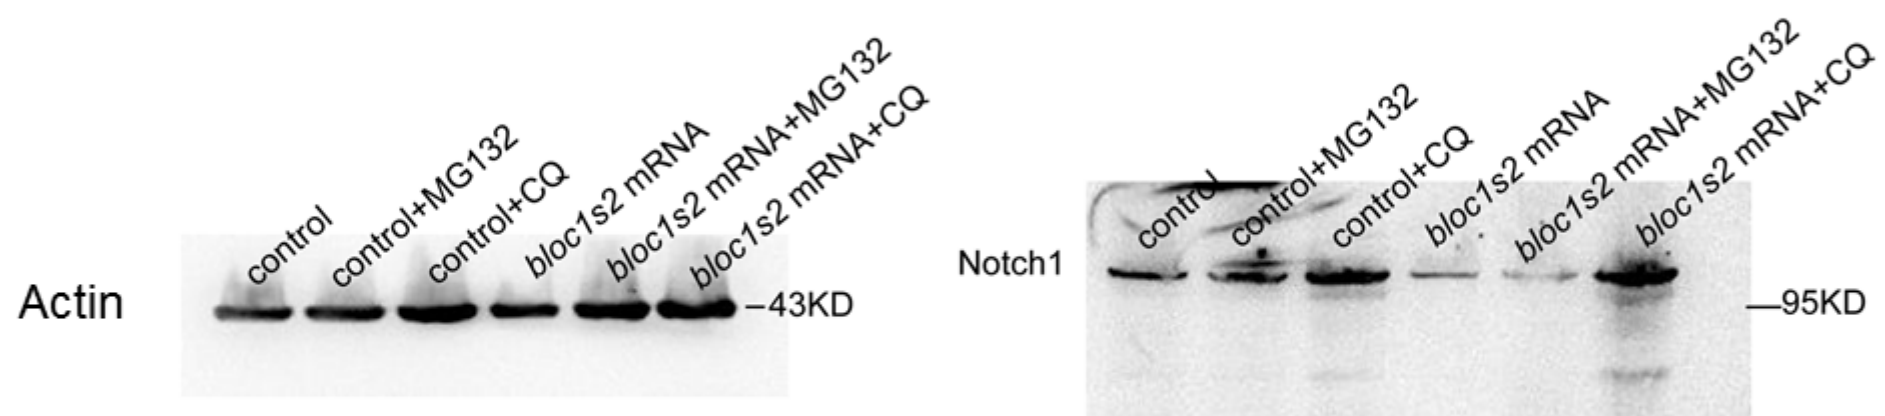

Figure 7A-source data 1

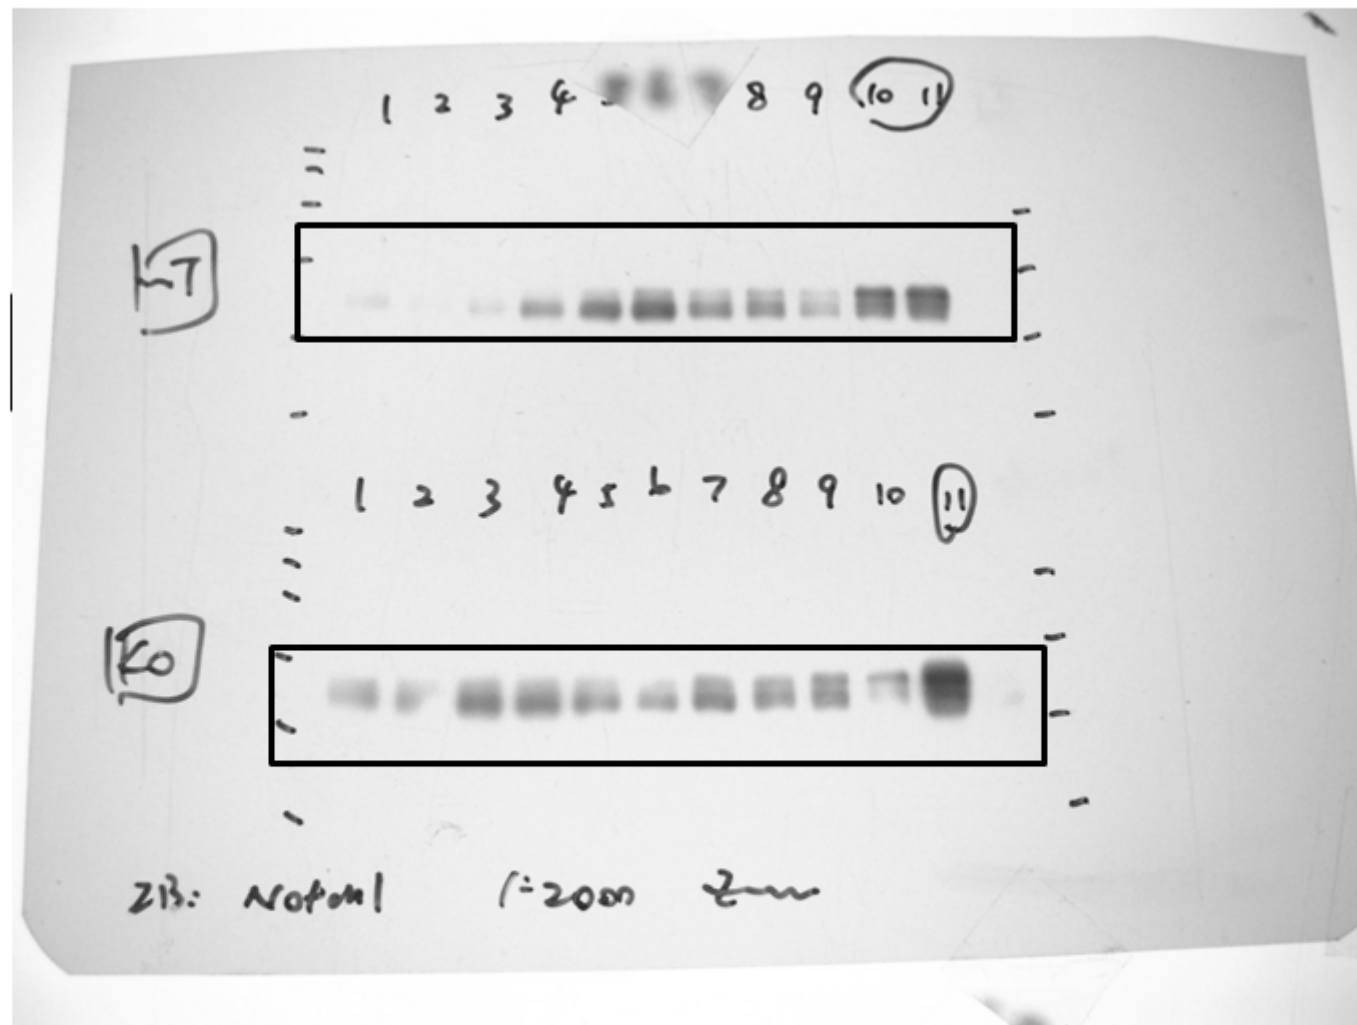

The black box shows the bands of Notch1 (N<sup>TM</sup>).

Figure 7A-source data 2

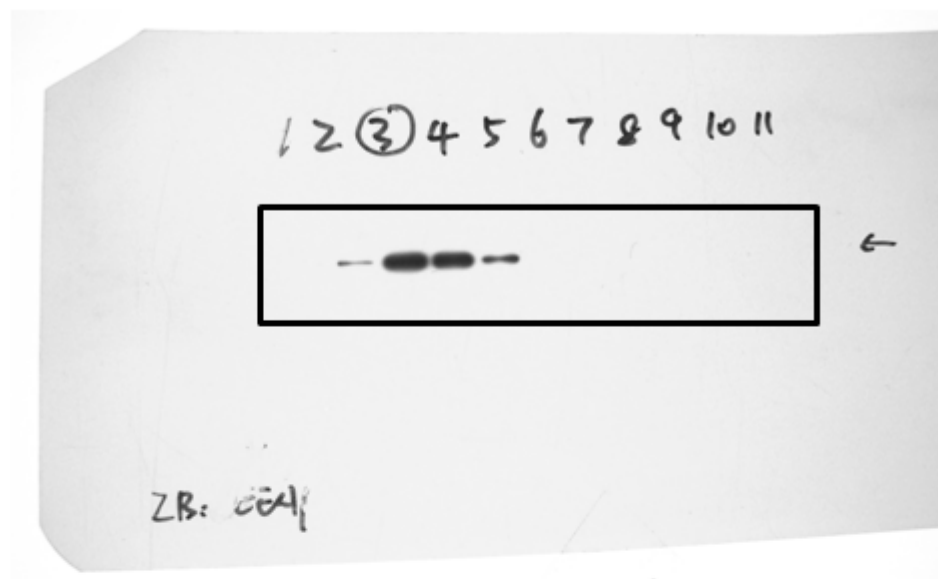

The black box shows the bands of EEA1.

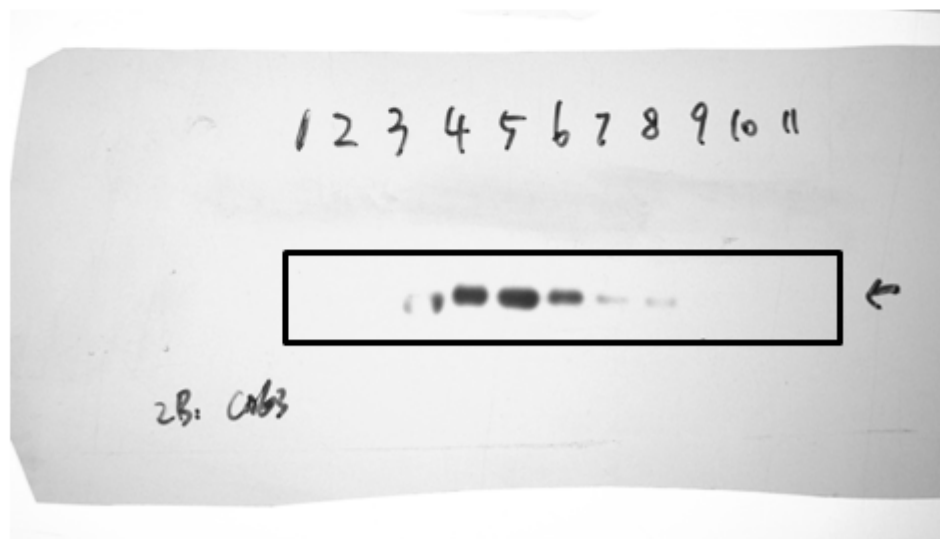

The black box shows the bands of CD63.

Figure 7A-source data 3

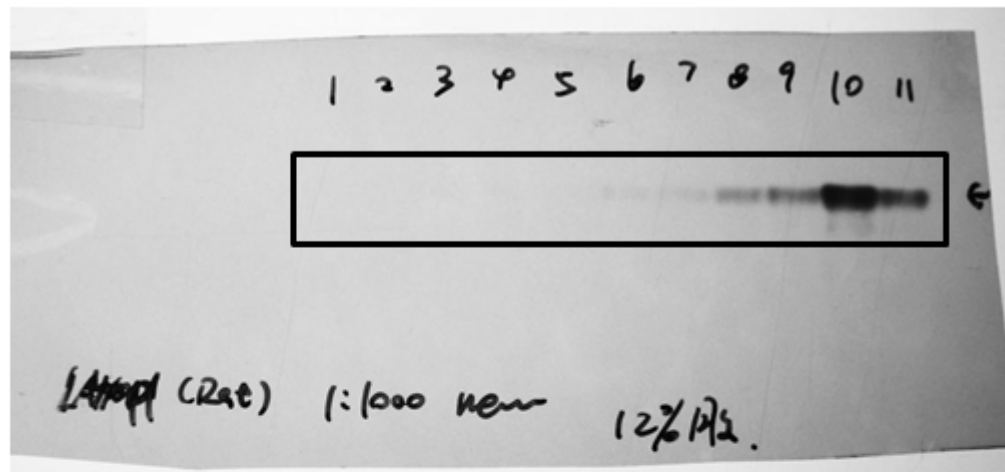

The black box shows the bands of LAMP1.

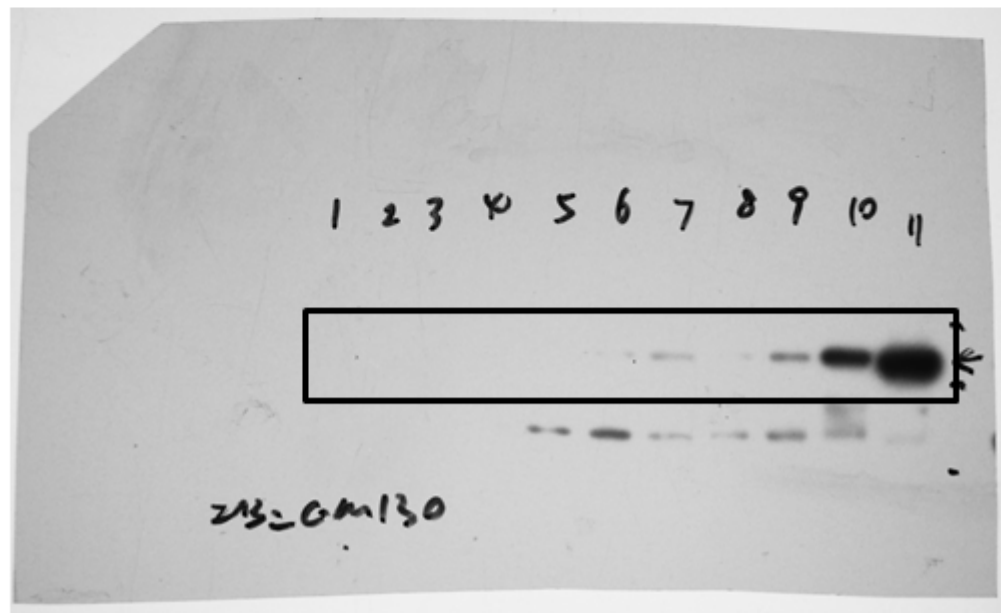

The black box shows the bands of GM130.

Figure 8A-source data 1

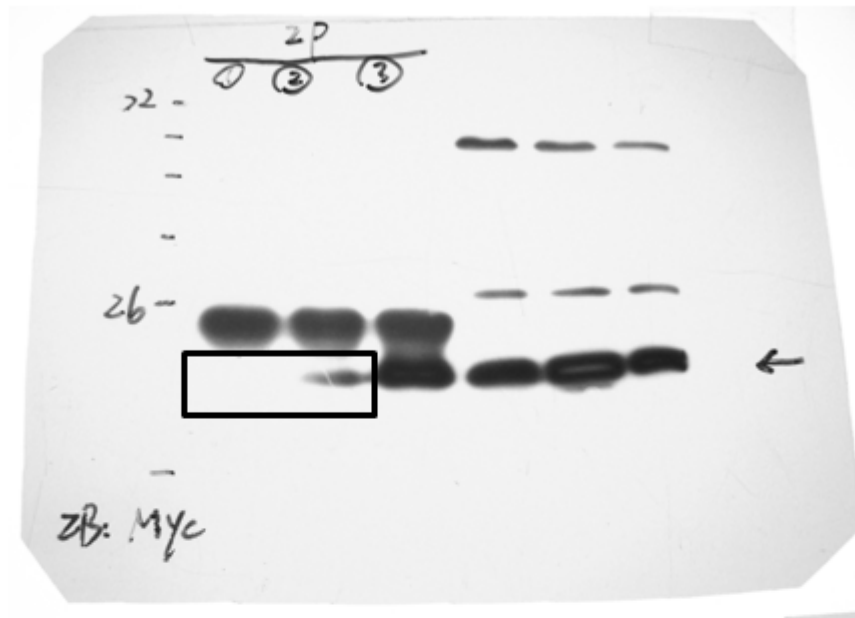

The black box shows the bands of Myc (IP).

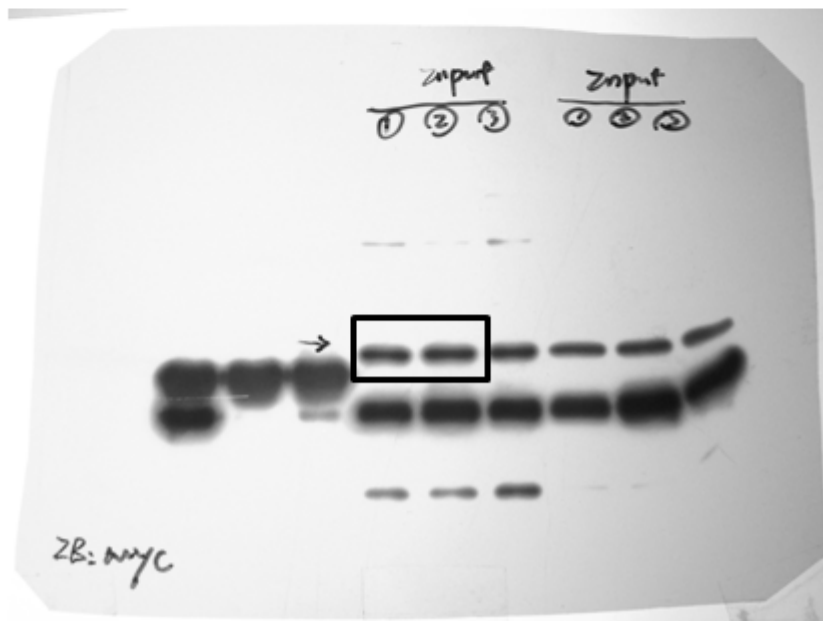

The black box shows the bands of Myc (input).

Figure 8A-source data 2

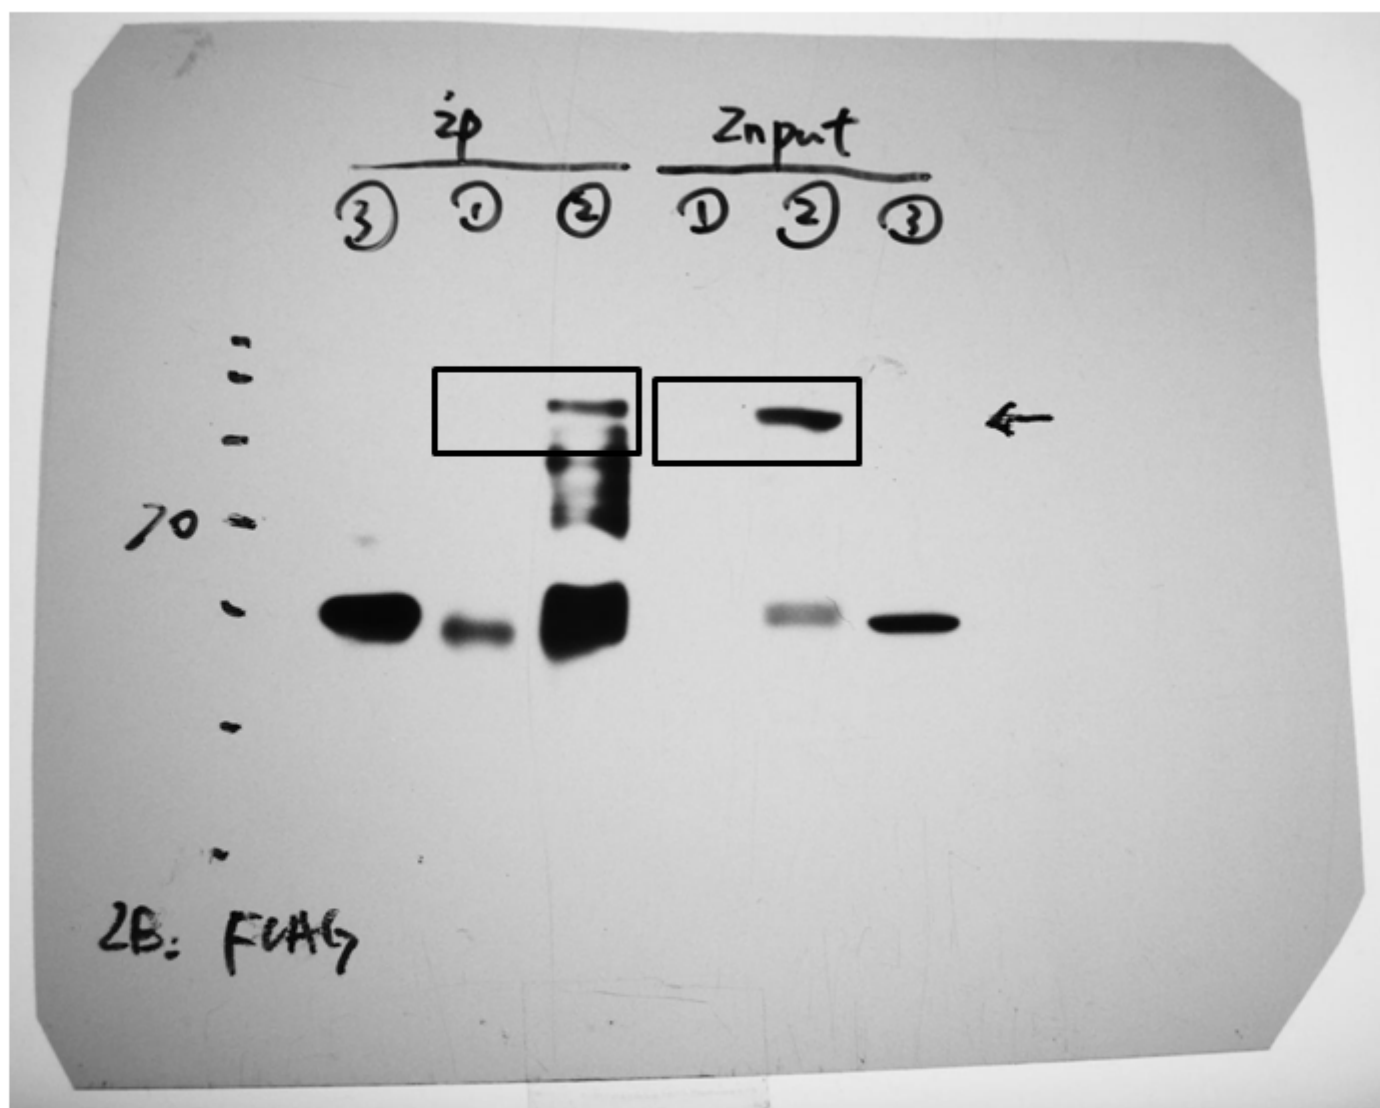

The left black box shows the bands of Flag (IP) and the right black box shows the bands of Flag (input) .

Figure 8B-source data 1

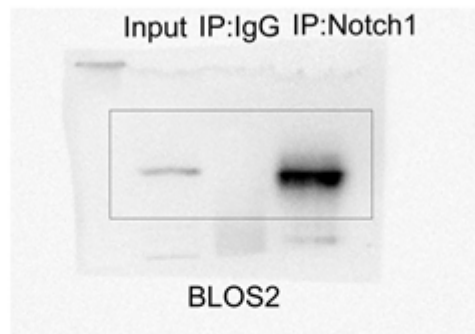

The black box shows the bands of BLOS2.

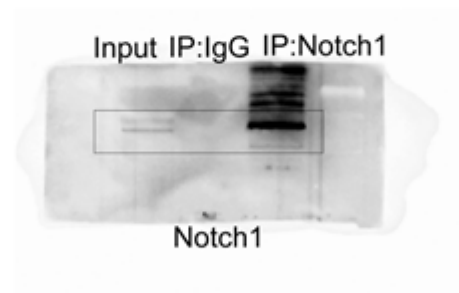

The black box shows the bands of Notch1.



Figure 8D-source data 1

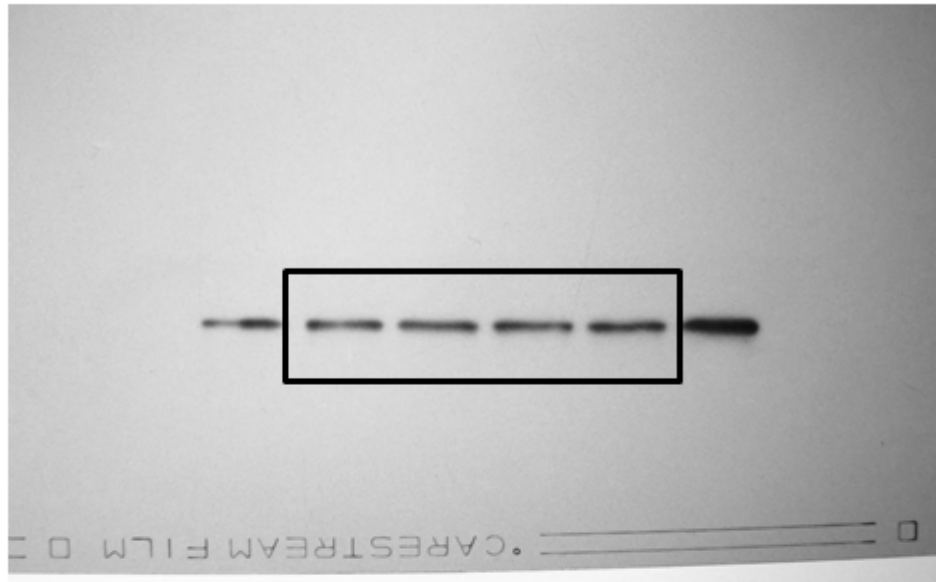

The black box shows the bands of Notch1 (N<sup>TM</sup>).

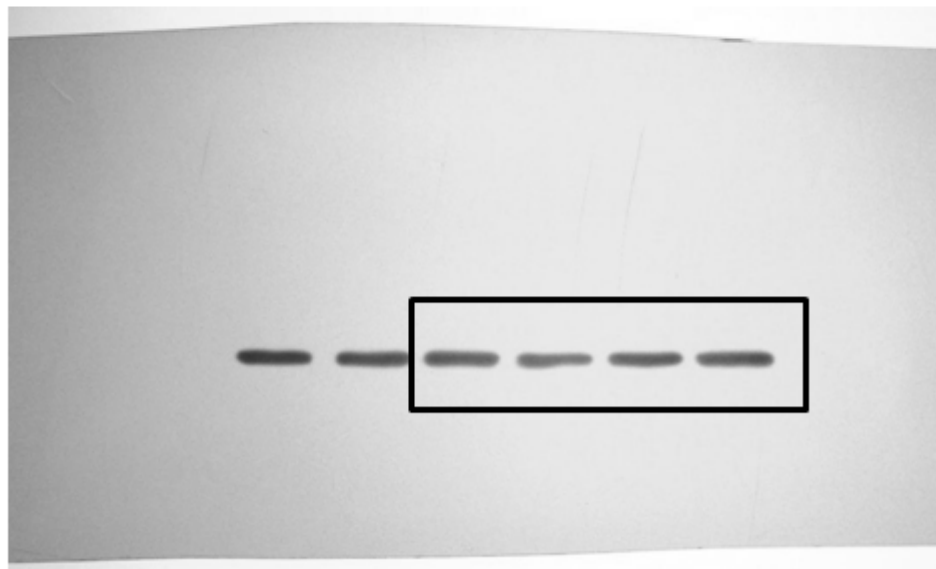

The black box shows the bands of  $\beta$ -actin.

Figure 8F-source data 1

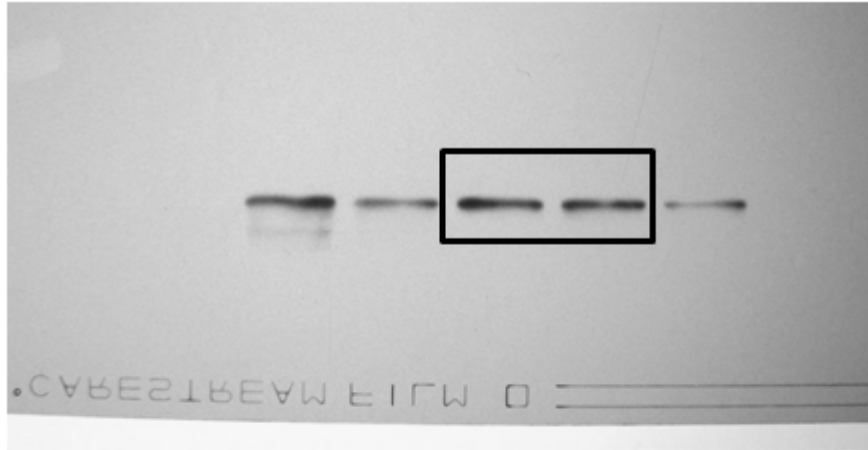

The black box shows the bands of Notch1 (N<sup>TM</sup>).

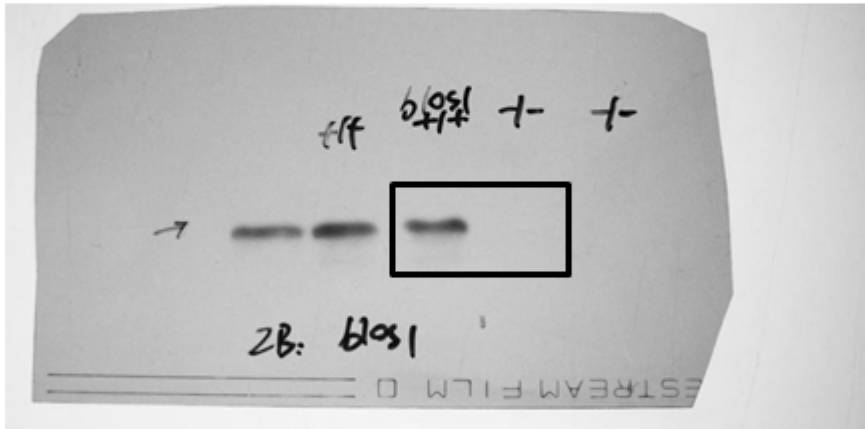

The black box shows the bands of BLOS1.

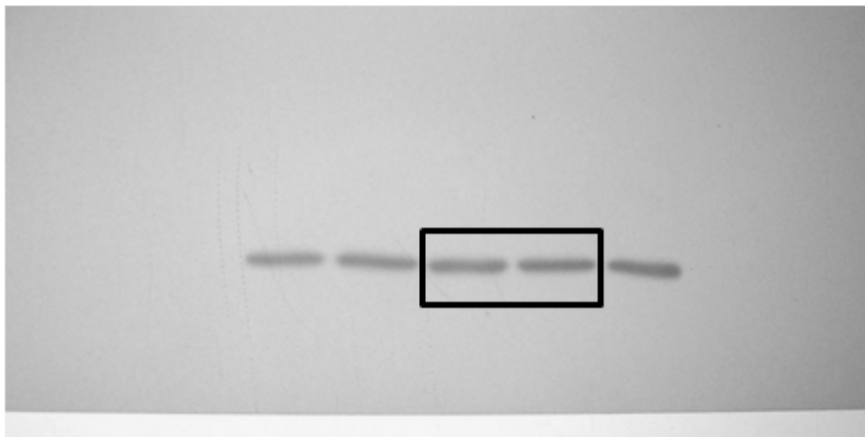

The black box shows the bands of  $\beta$ -actin.

Figure 1-figure supplement 1C-source data 1

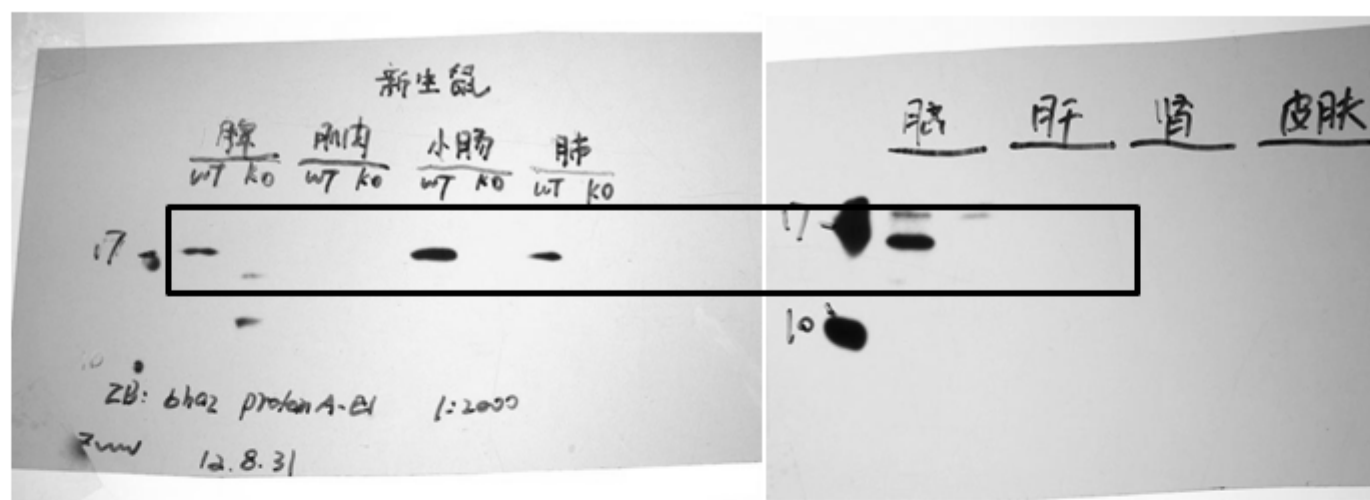

The black box shows the bands of BLOS2.

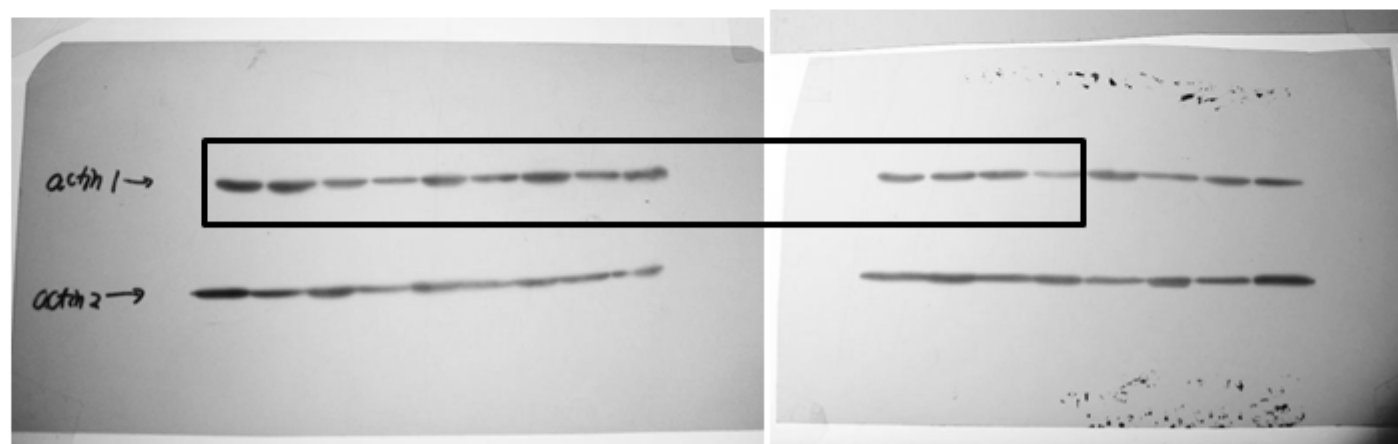

The black box shows the bands of  $\beta$ -actin.

Figure 3-figure supplement 1B-source data 1

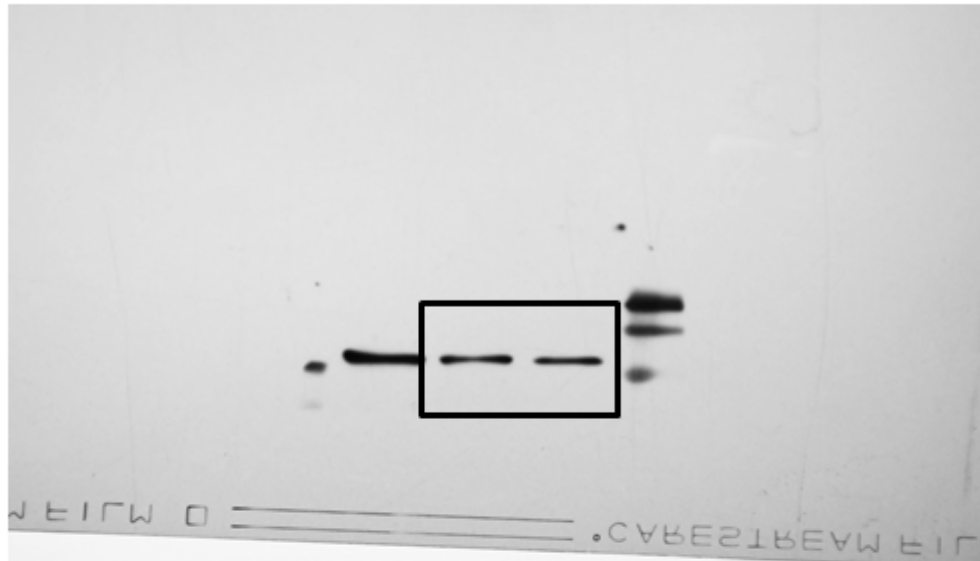

The black box shows the bands of Jagged1.

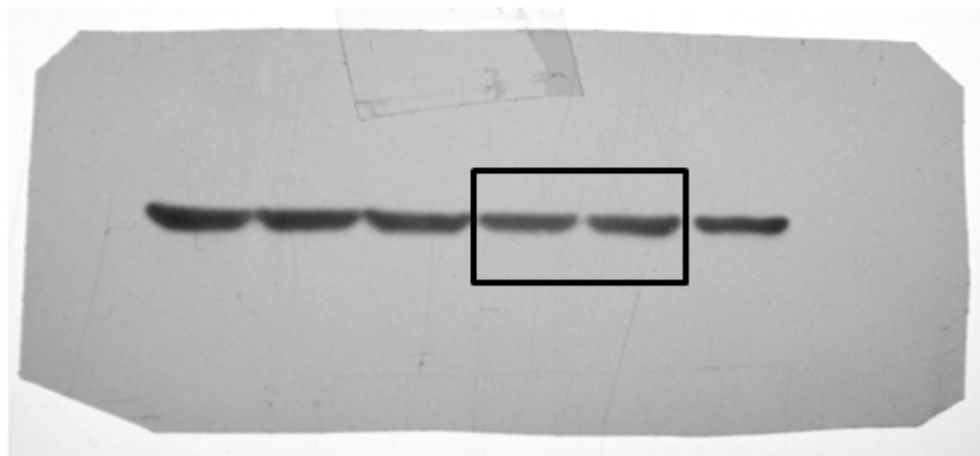

The black box shows the bands of  $\beta$ -actin.

Figure 3-figure supplement 1G-source data 1

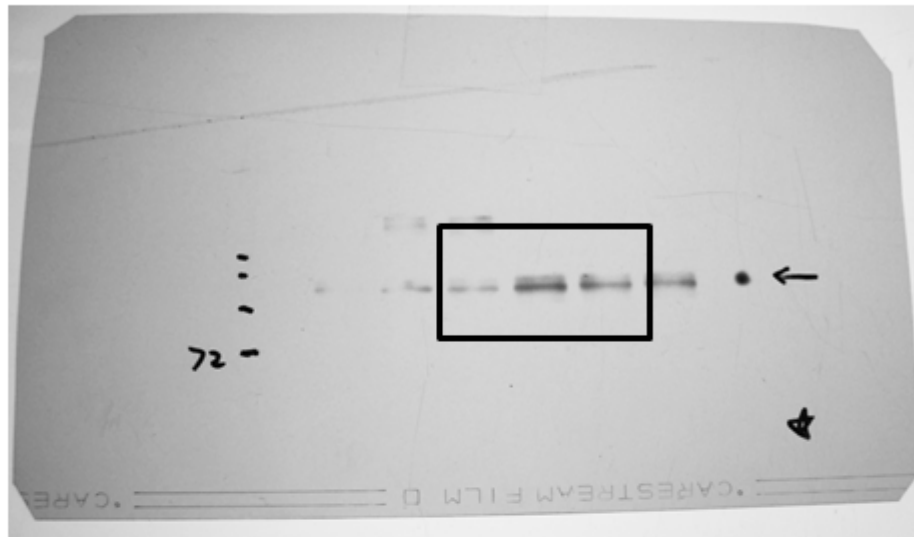

The black box shows the bands of Notch1 (N<sup>TM</sup>).

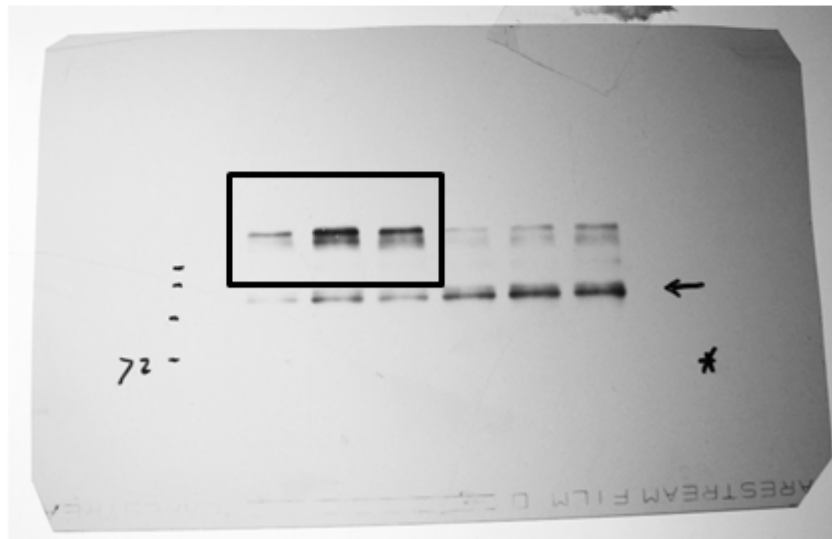

The black box shows the bands of NICD1.

Figure 3-figure supplement 1G-source data 2

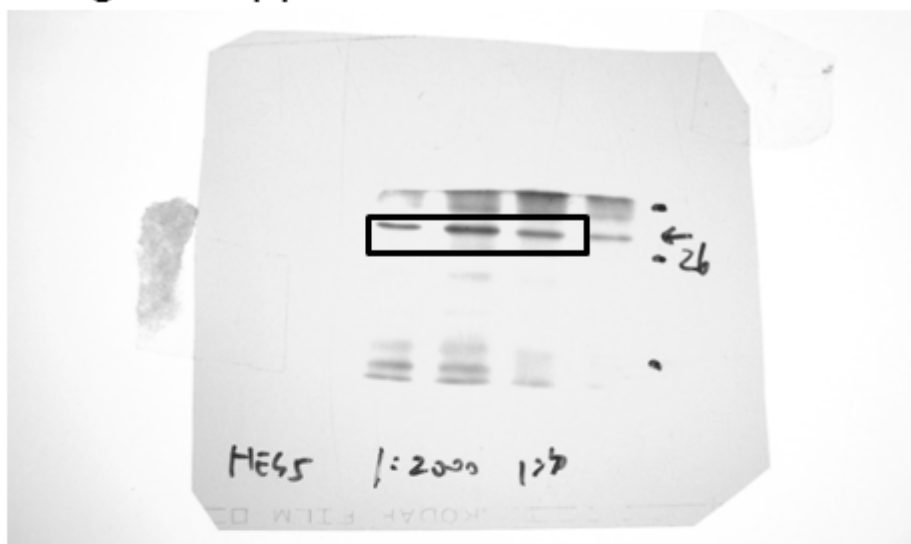

The black box shows the bands of Hes5.

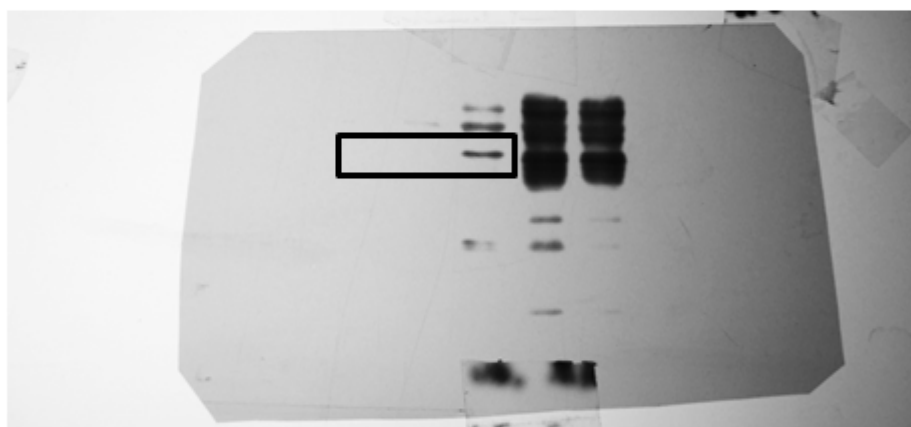

The black box shows the bands of Flag-BLOS2.

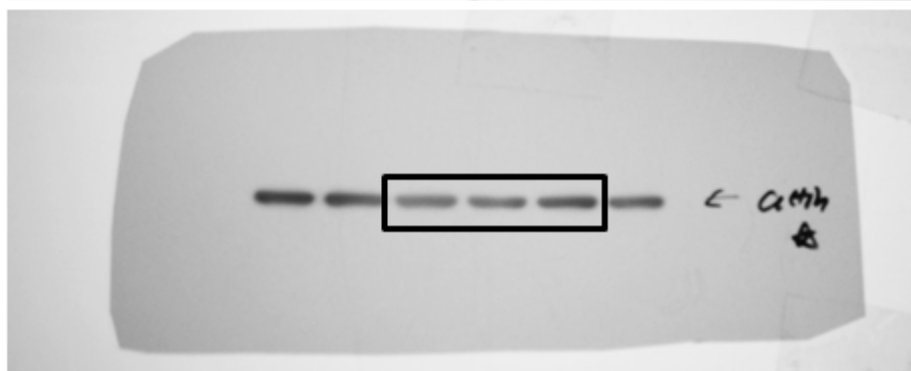

The black box shows the bands of  $\beta$ -actin.

Figure 3-figure supplement 2A-source data 1

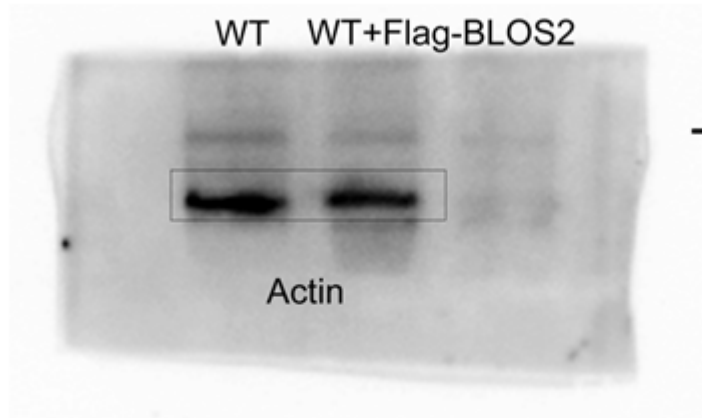

The black box shows the bands of Actin.

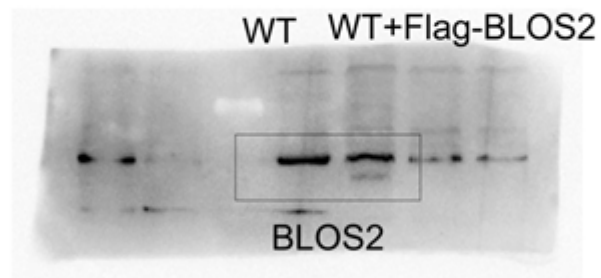

The black box shows the bands of BLOS2.

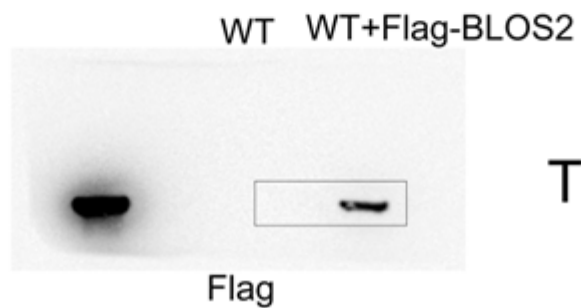

The black box shows the bands of Flag.

Figure 5-figure supplement 2D-source data 1

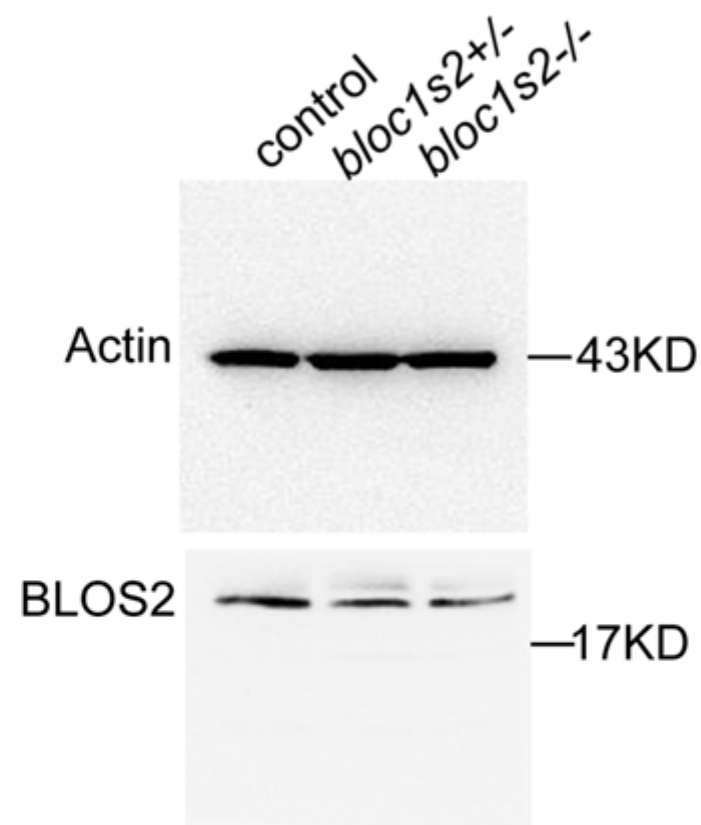



Figure 5-figure supplement 3C-source data 1

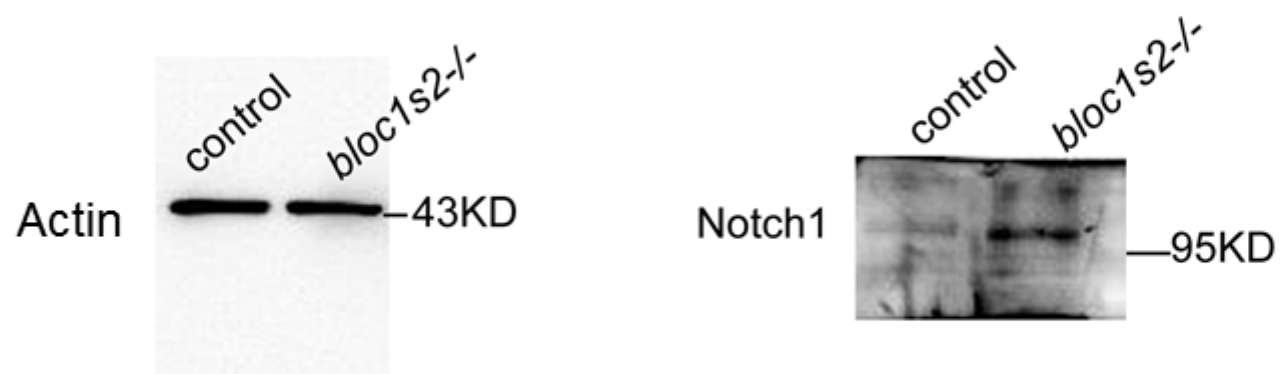

Figure 8-figure supplement 1A-source data 1

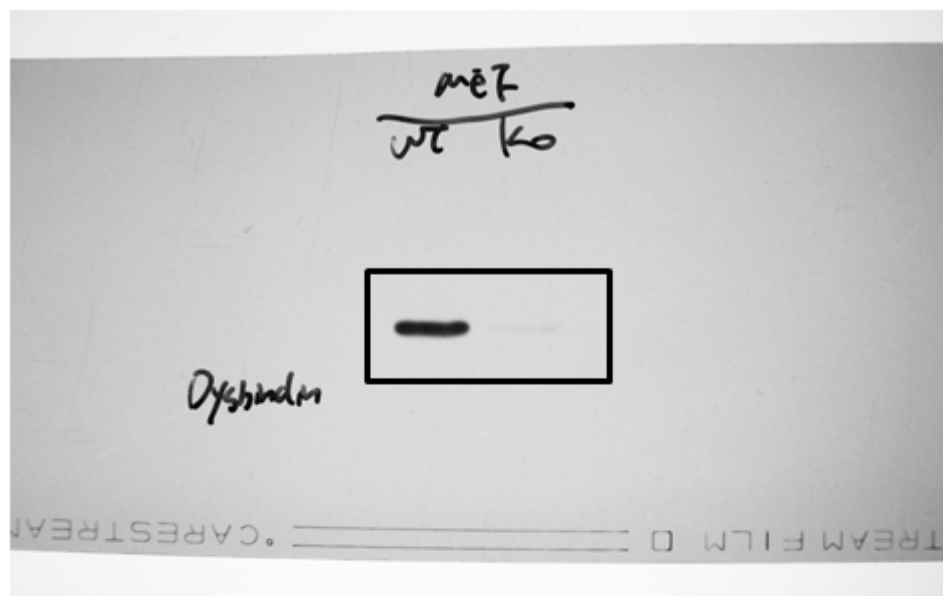

The black box shows the bands of Dysbindin.

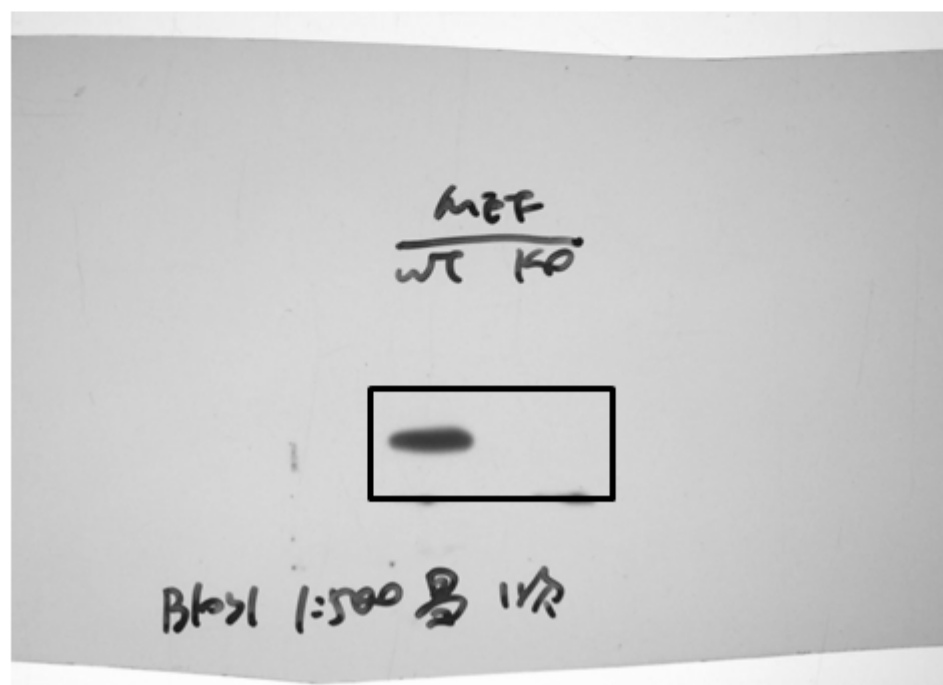

The black box shows the bands of BLOS1.

Figure 8-figure supplement 1A-source data 2

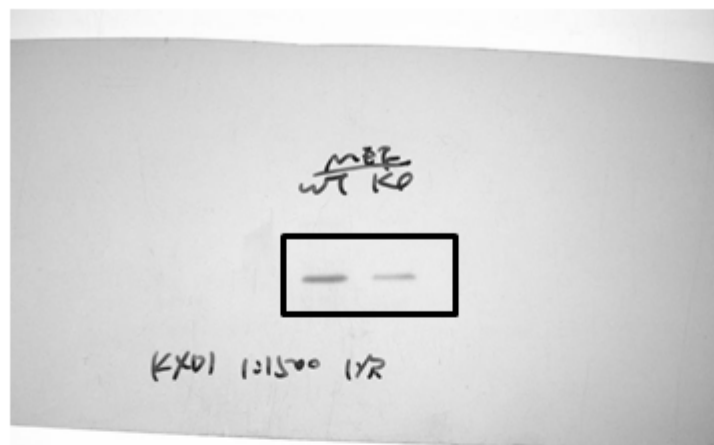

The black box shows the bands of KXD1.

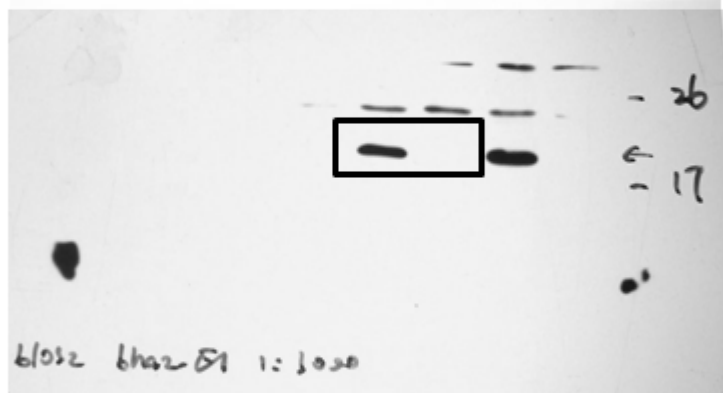

The black box shows the bands of BLOS2.

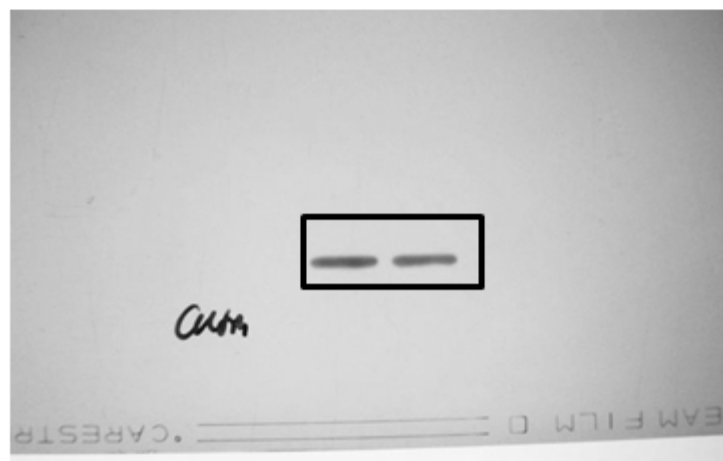

The black box shows the bands of  $\beta$ -actin.

Figure 8-figure supplement 2B-source data 1

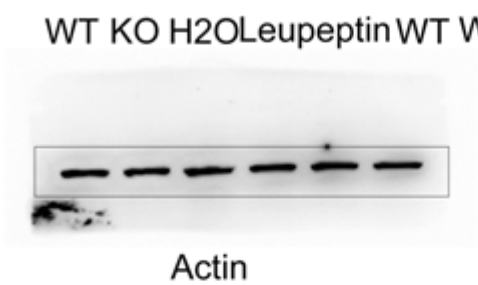

The black box shows the bands of Actin.

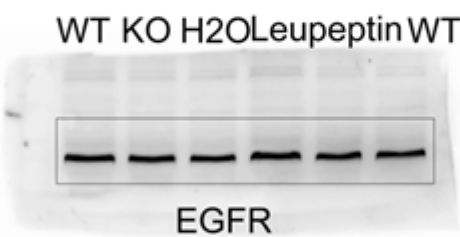

The black box shows the bands of EGFR.

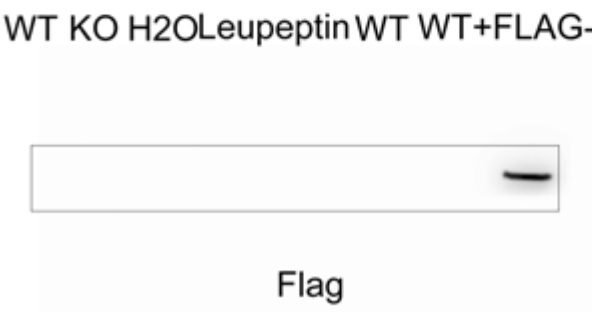

The black box shows the bands of Flag.

Figure 8-figure supplement 2D-source data 1

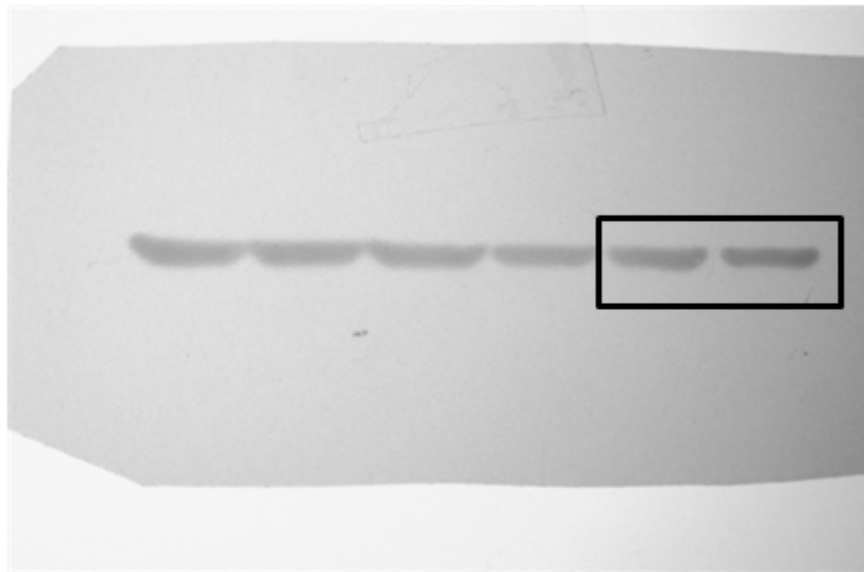

The black box shows the bands of EGFR.

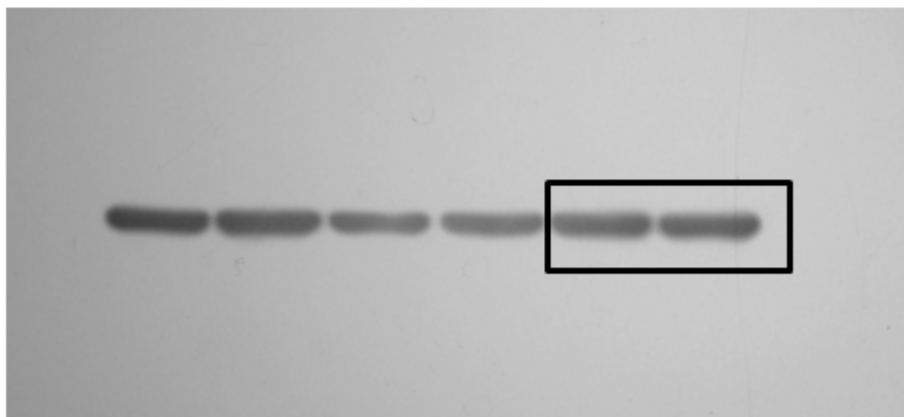

The black box shows the bands of  $\beta$ -actin.

Figure 8-figure supplement 2F-source data 1

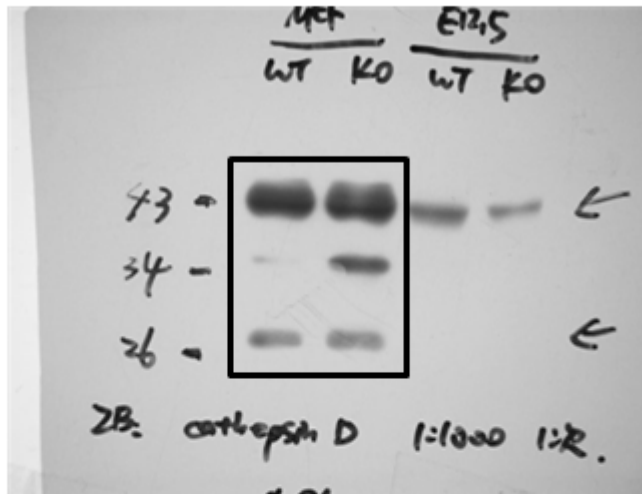

The black box shows the bands of Cathepsin D.

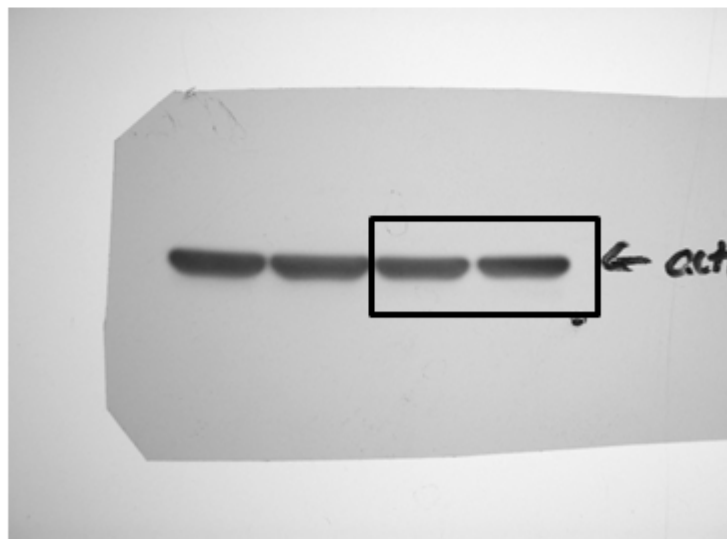

The black box shows the bands of  $\beta$ -actin.
