# Supplementary material for: BLOS2 negatively regulates Notch signaling during neural and hematopoietic stem and progenitor cell development
Source: eLife journal article supplement (doi:10.7554/elife.18108), 2016-10-10
Supplement: supp [file elife-18108-supp-v1.zip]

**A**

*Dll1*

Relative Gene Expression

*Bloc1s2*<sup>+/+</sup> *Bloc1s2*<sup>-/-</sup>

n.s.

**B**

E14.5

Jag1

β-actin

+/+ -/-

Normalized Jag1 (relative to WT)

*Bloc1s2*<sup>+/+</sup> *Bloc1s2*<sup>-/-</sup>

n.s.

**C**

*itch*

Relative Gene Expression

*Bloc1s2*<sup>+/+</sup> *Bloc1s2*<sup>-/-</sup>

n.s.

*dtx2*

Relative Gene Expression

*Bloc1s2*<sup>+/+</sup> *Bloc1s2*<sup>-/-</sup>

n.s.

**D**

*Hes1*

Relative Gene Expression

WT+FLAG WT+FLAG-BLOS2

\*\*

**E**

*Hes5*

Relative Gene Expression

WT+FLAG WT+FLAG-BLOS2

\*\*

**F**

*BLBP*

Relative Gene Expression

WT+FLAG WT+FLAG-BLOS2

\*

**G**

MEF

WT KO KO+FLAG-BLOS2

- Notch1 (N<sup>TM</sup>)

- NICD1

- Hes5

- FLAG-BLOS2

- β-actin

**H**

Normalized Notch1 (N<sup>TM</sup>), NICD1 and Hes5 (relative to WT)

WT KO KO+FLAG-BLOS2

Notch1(N<sup>TM</sup>)

NICD1

Hes5

\*\*\*
