# Supplementary figures and images for: BLOS2 negatively regulates Notch signaling during neural and hematopoietic stem and progenitor cell development
Source: eLife journal article supplement (doi:10.7554/elife.18108), 2016-10-10

(Figure 7-figure supplement 1)

A

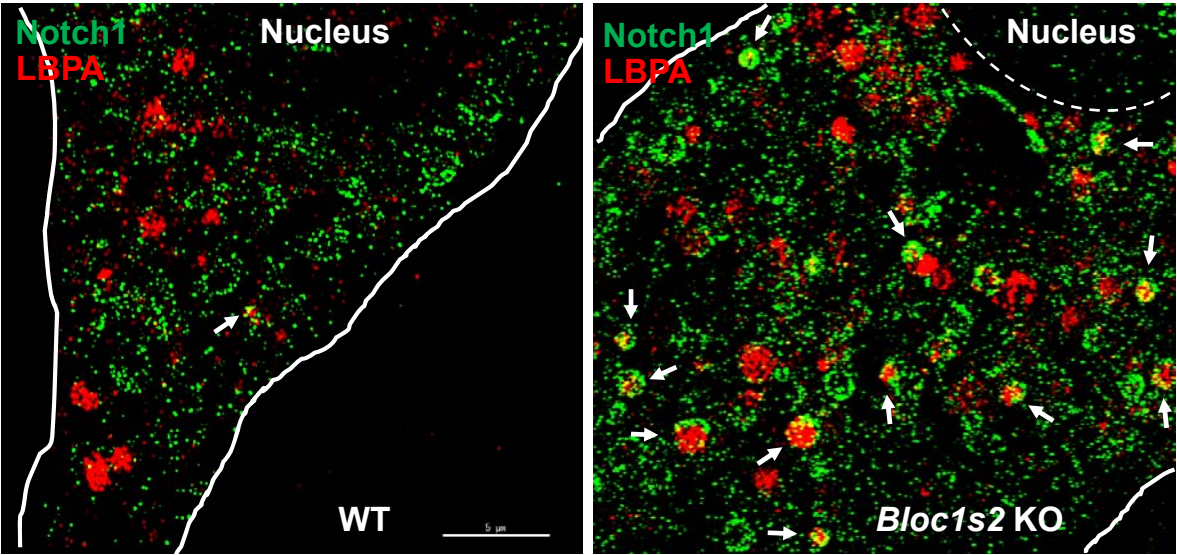

B

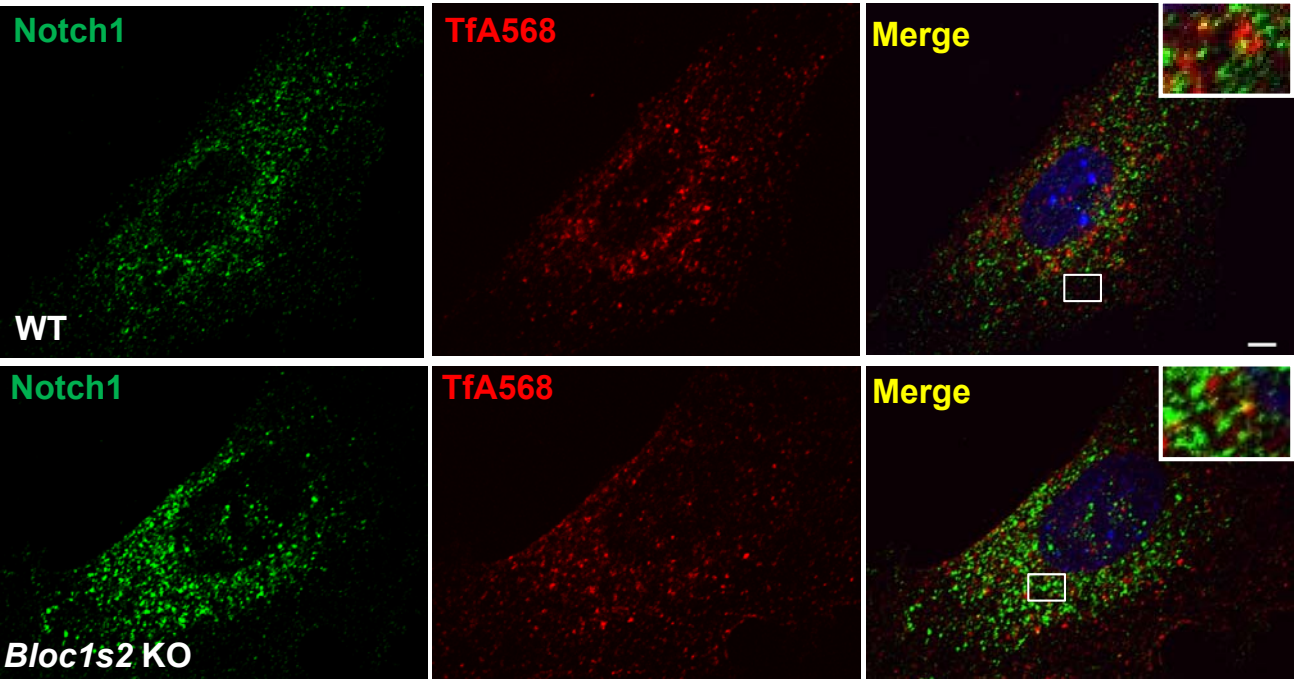

Supplement: supp [file elife-18108-supp-v1.zip]

(Figure 5-figure supplement 2)

A

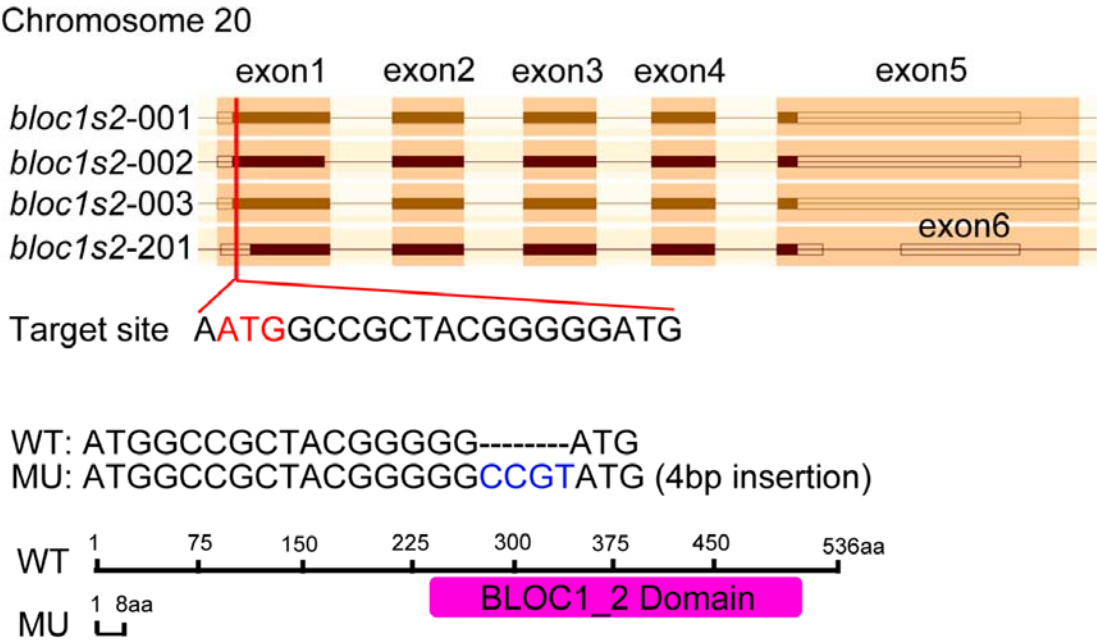

B

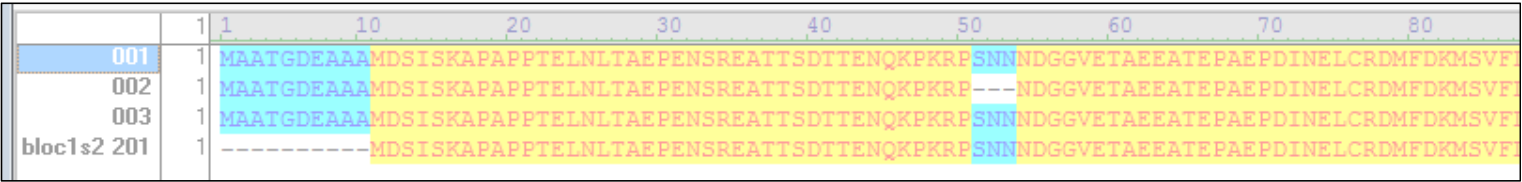

C

| Transcript | Peptide length | Predicted MW (kDa) |
|------------|----------------|--------------------|
| 001        | 177 aa         | 19.892             |
| 002        | 174 aa         | 19.577             |
| 003        | 177 aa         | 19.892             |
| 201        | 167 aa         | 19.003             |

D

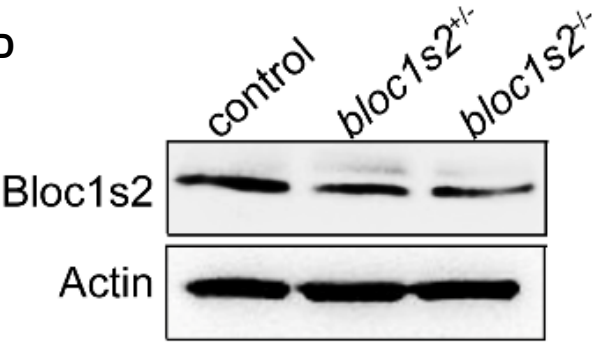

Supplement: supp [file elife-18108-supp-v1.zip]

(Figure 4-figure supplement 1)

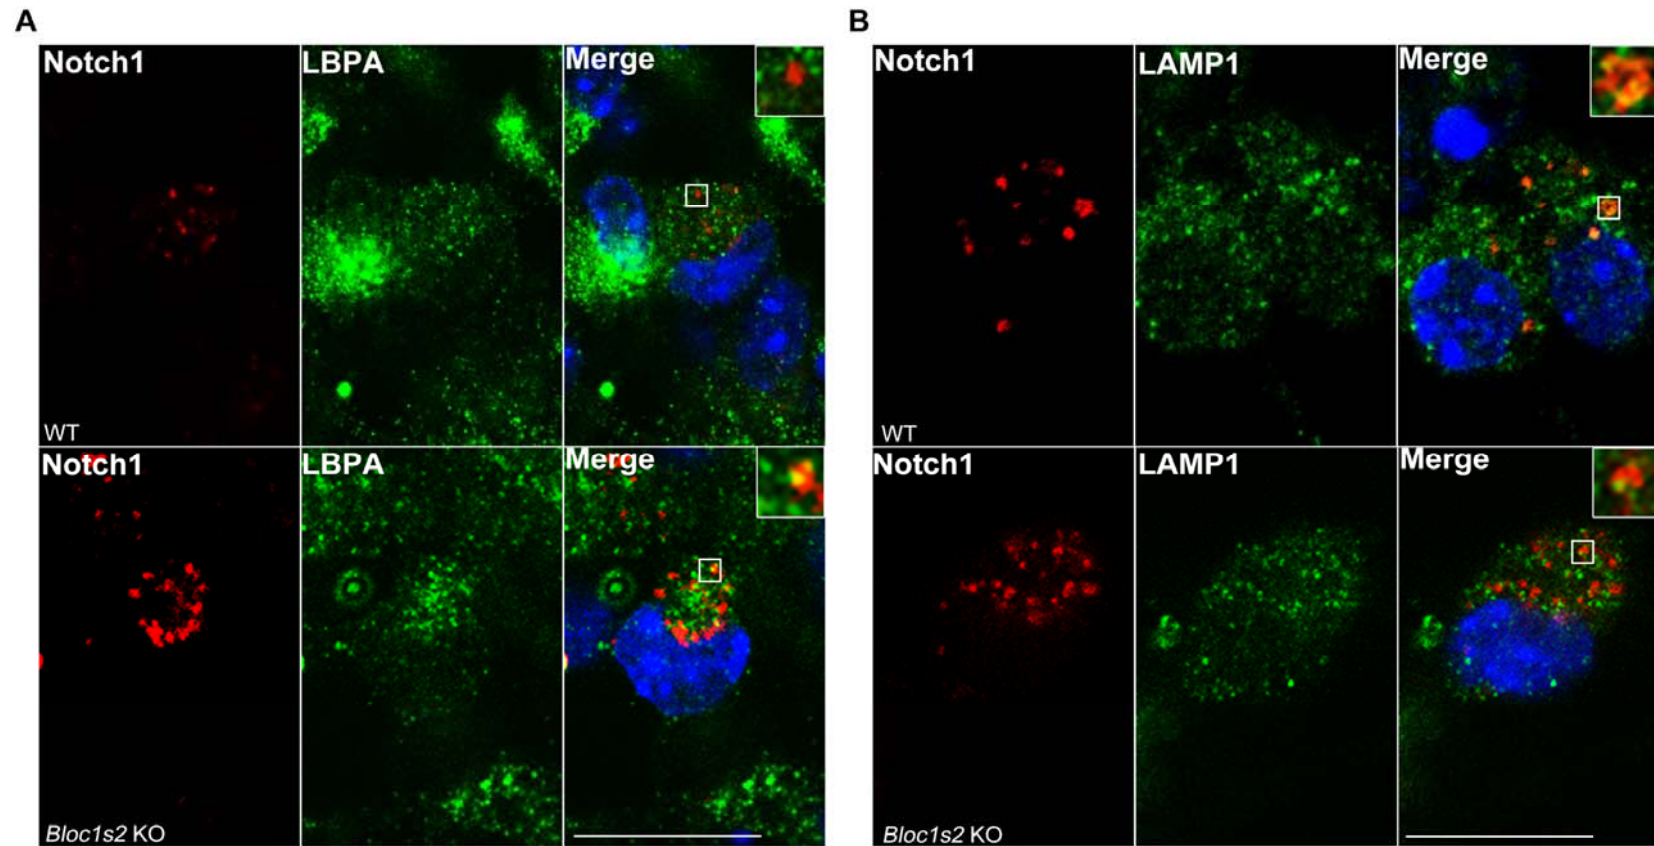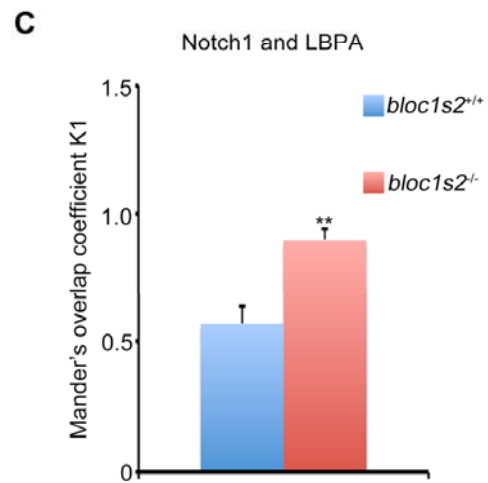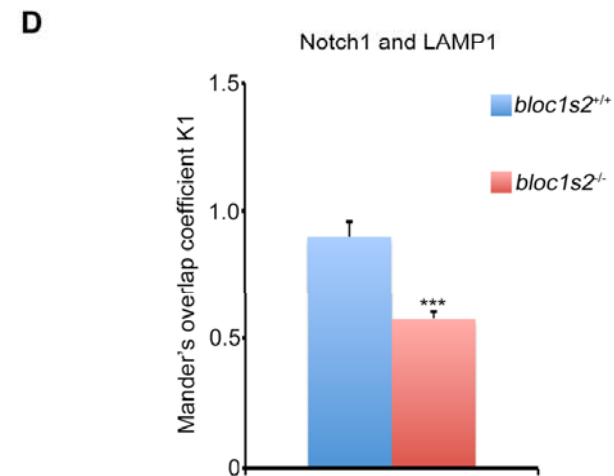

Supplement: supp [file elife-18108-supp-v1.zip]

(Figure 8-figure supplement 2)

A

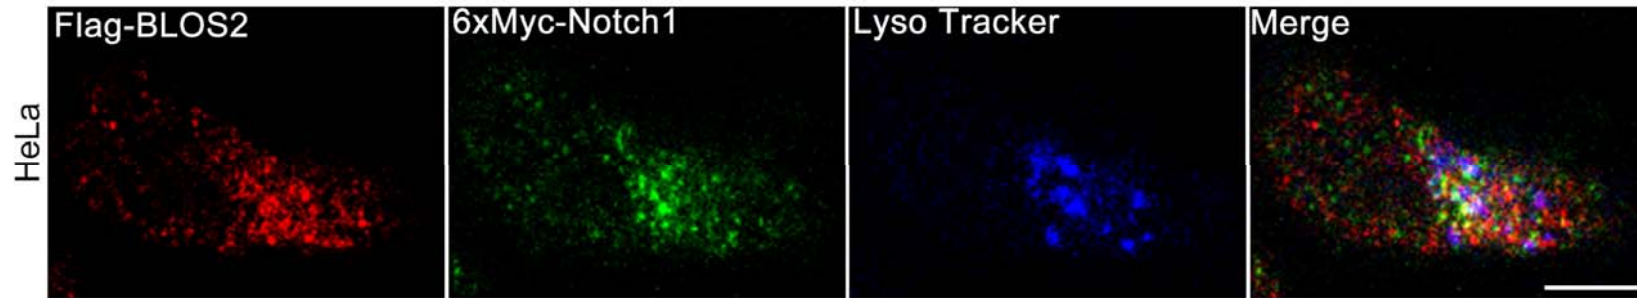

B

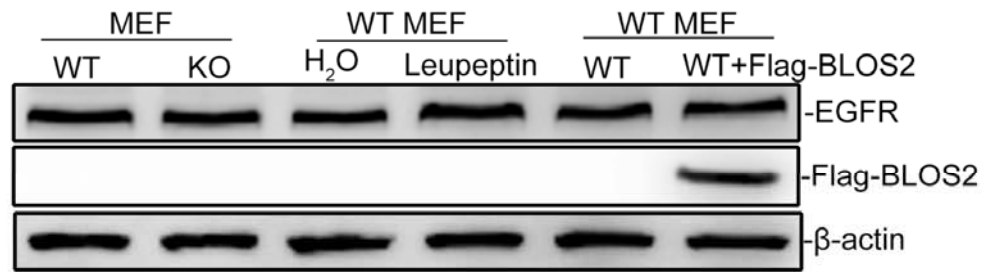

C

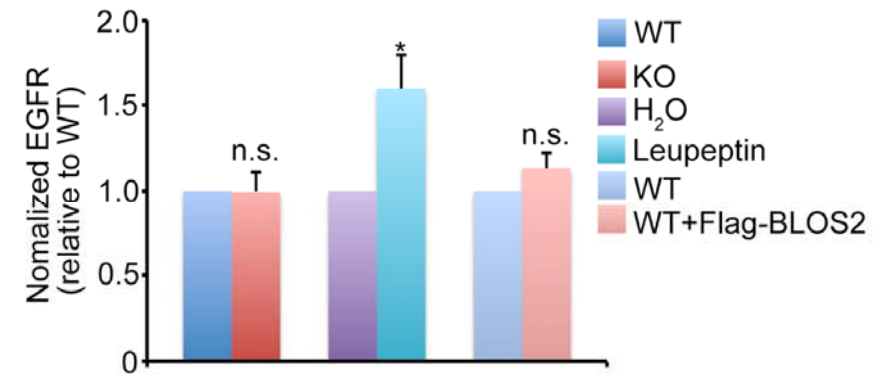

D

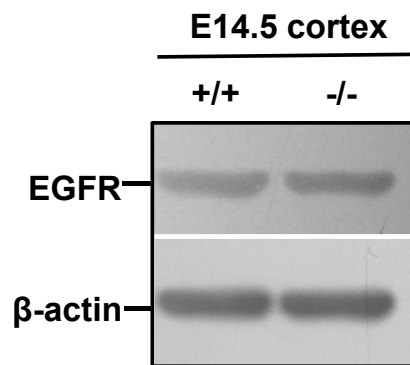

E

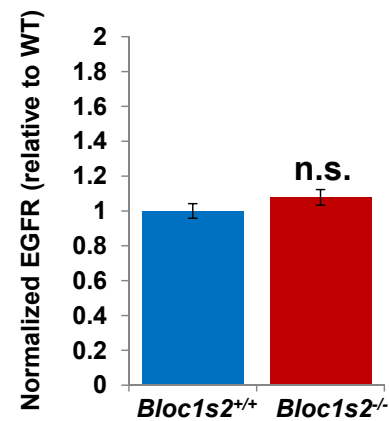

F

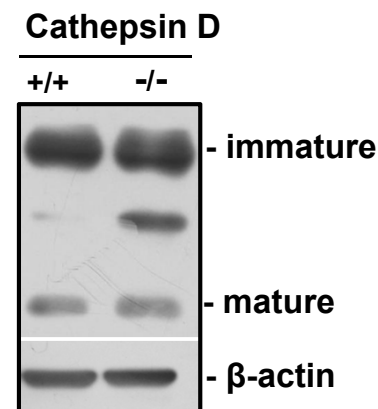

G

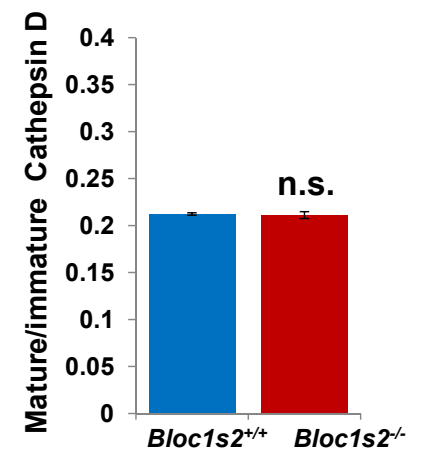

Supplement: supp [file elife-18108-supp-v1.zip]

(Figure 8-figure supplement 1)

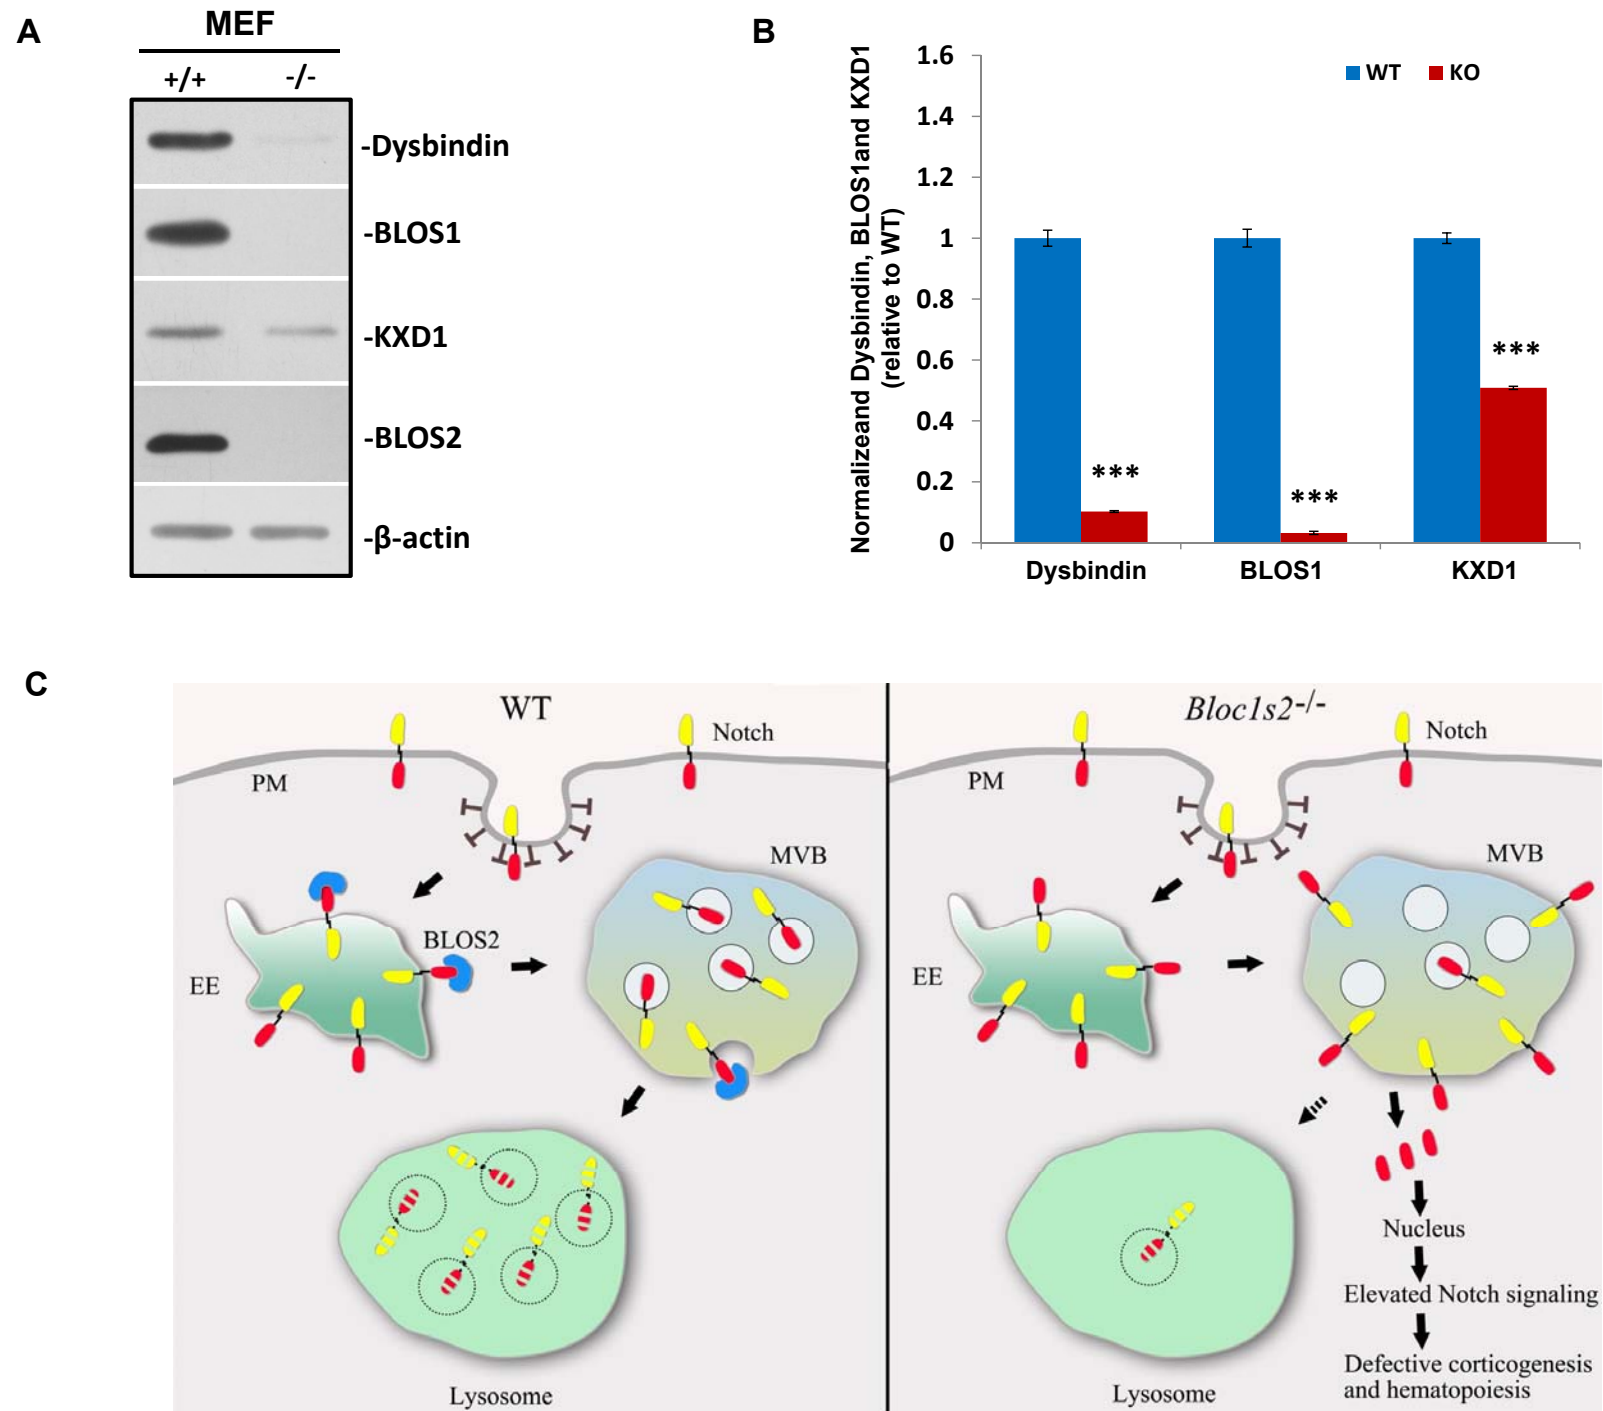

Supplement: supp [file elife-18108-supp-v1.zip]

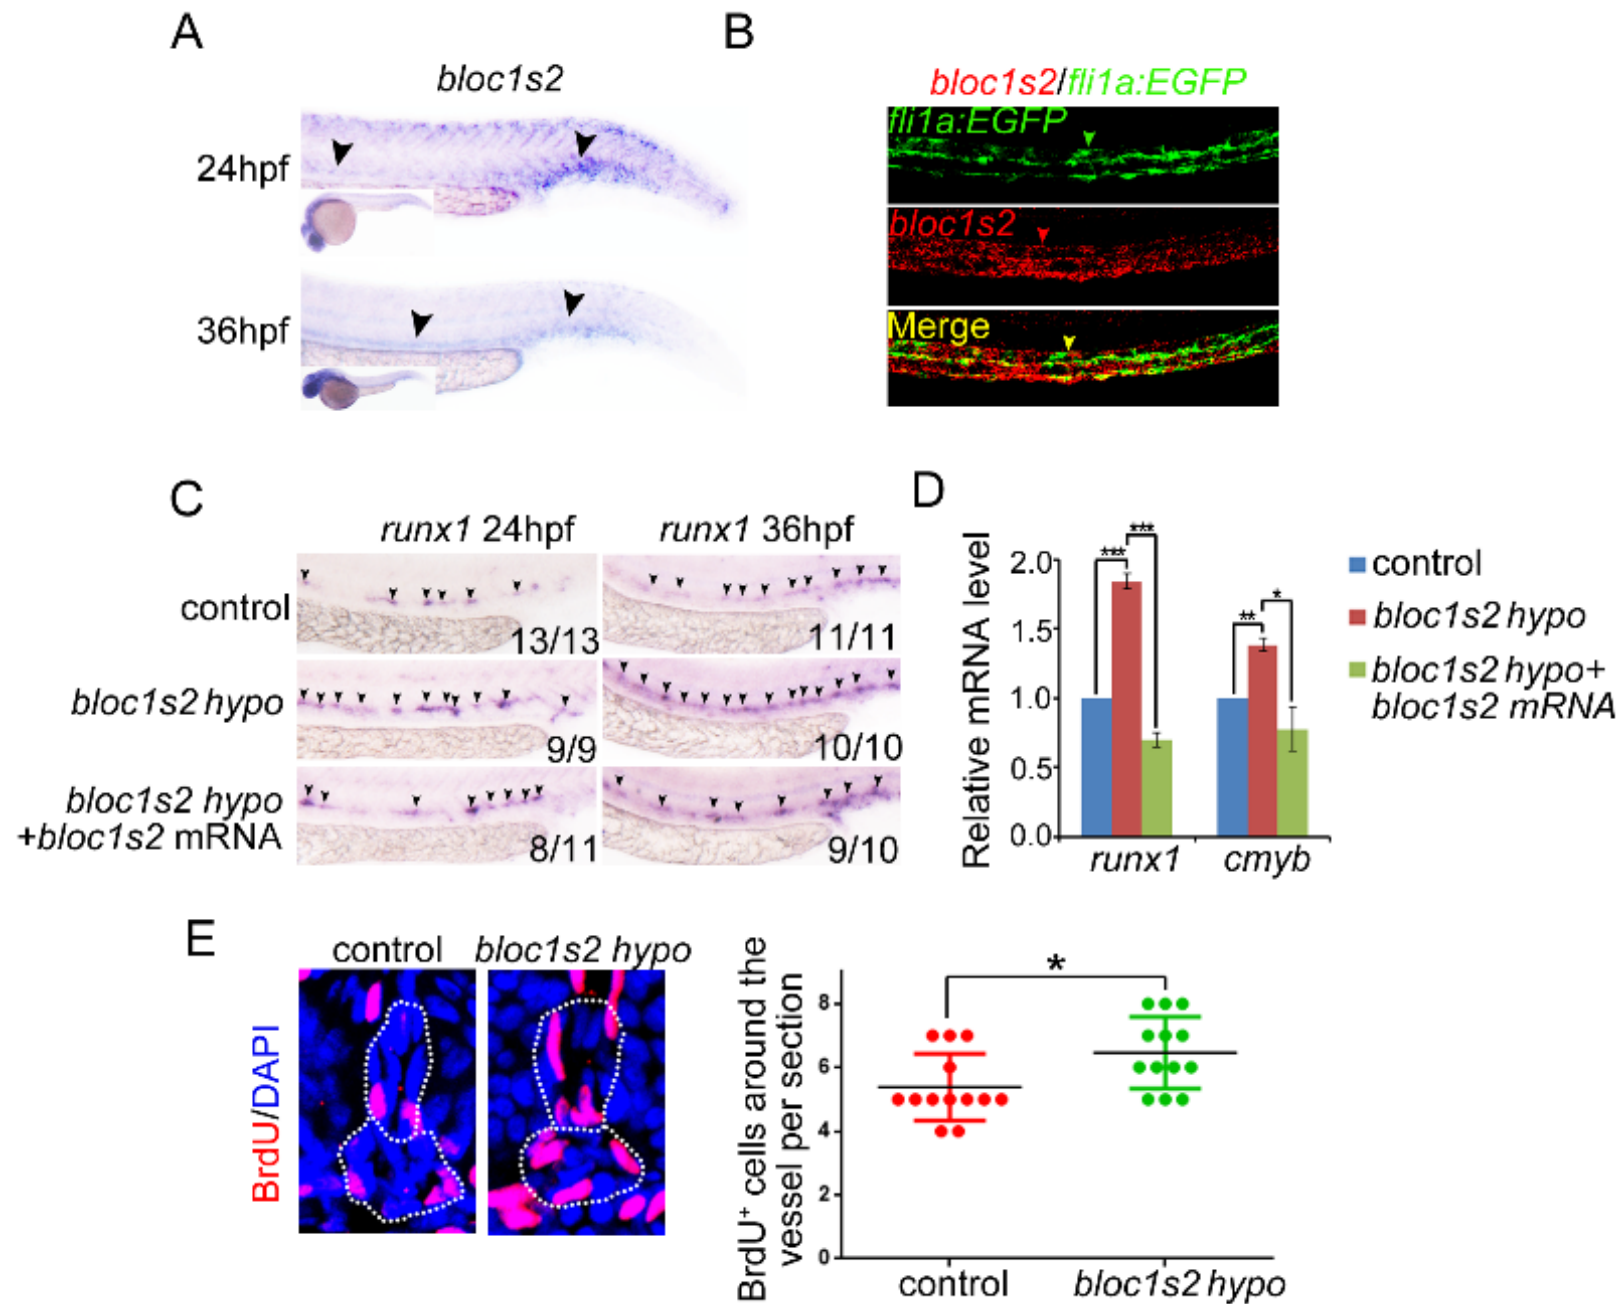

Supplement: supp [file elife-18108-supp-v1.zip]

(Figure 3-figure supplement 3)

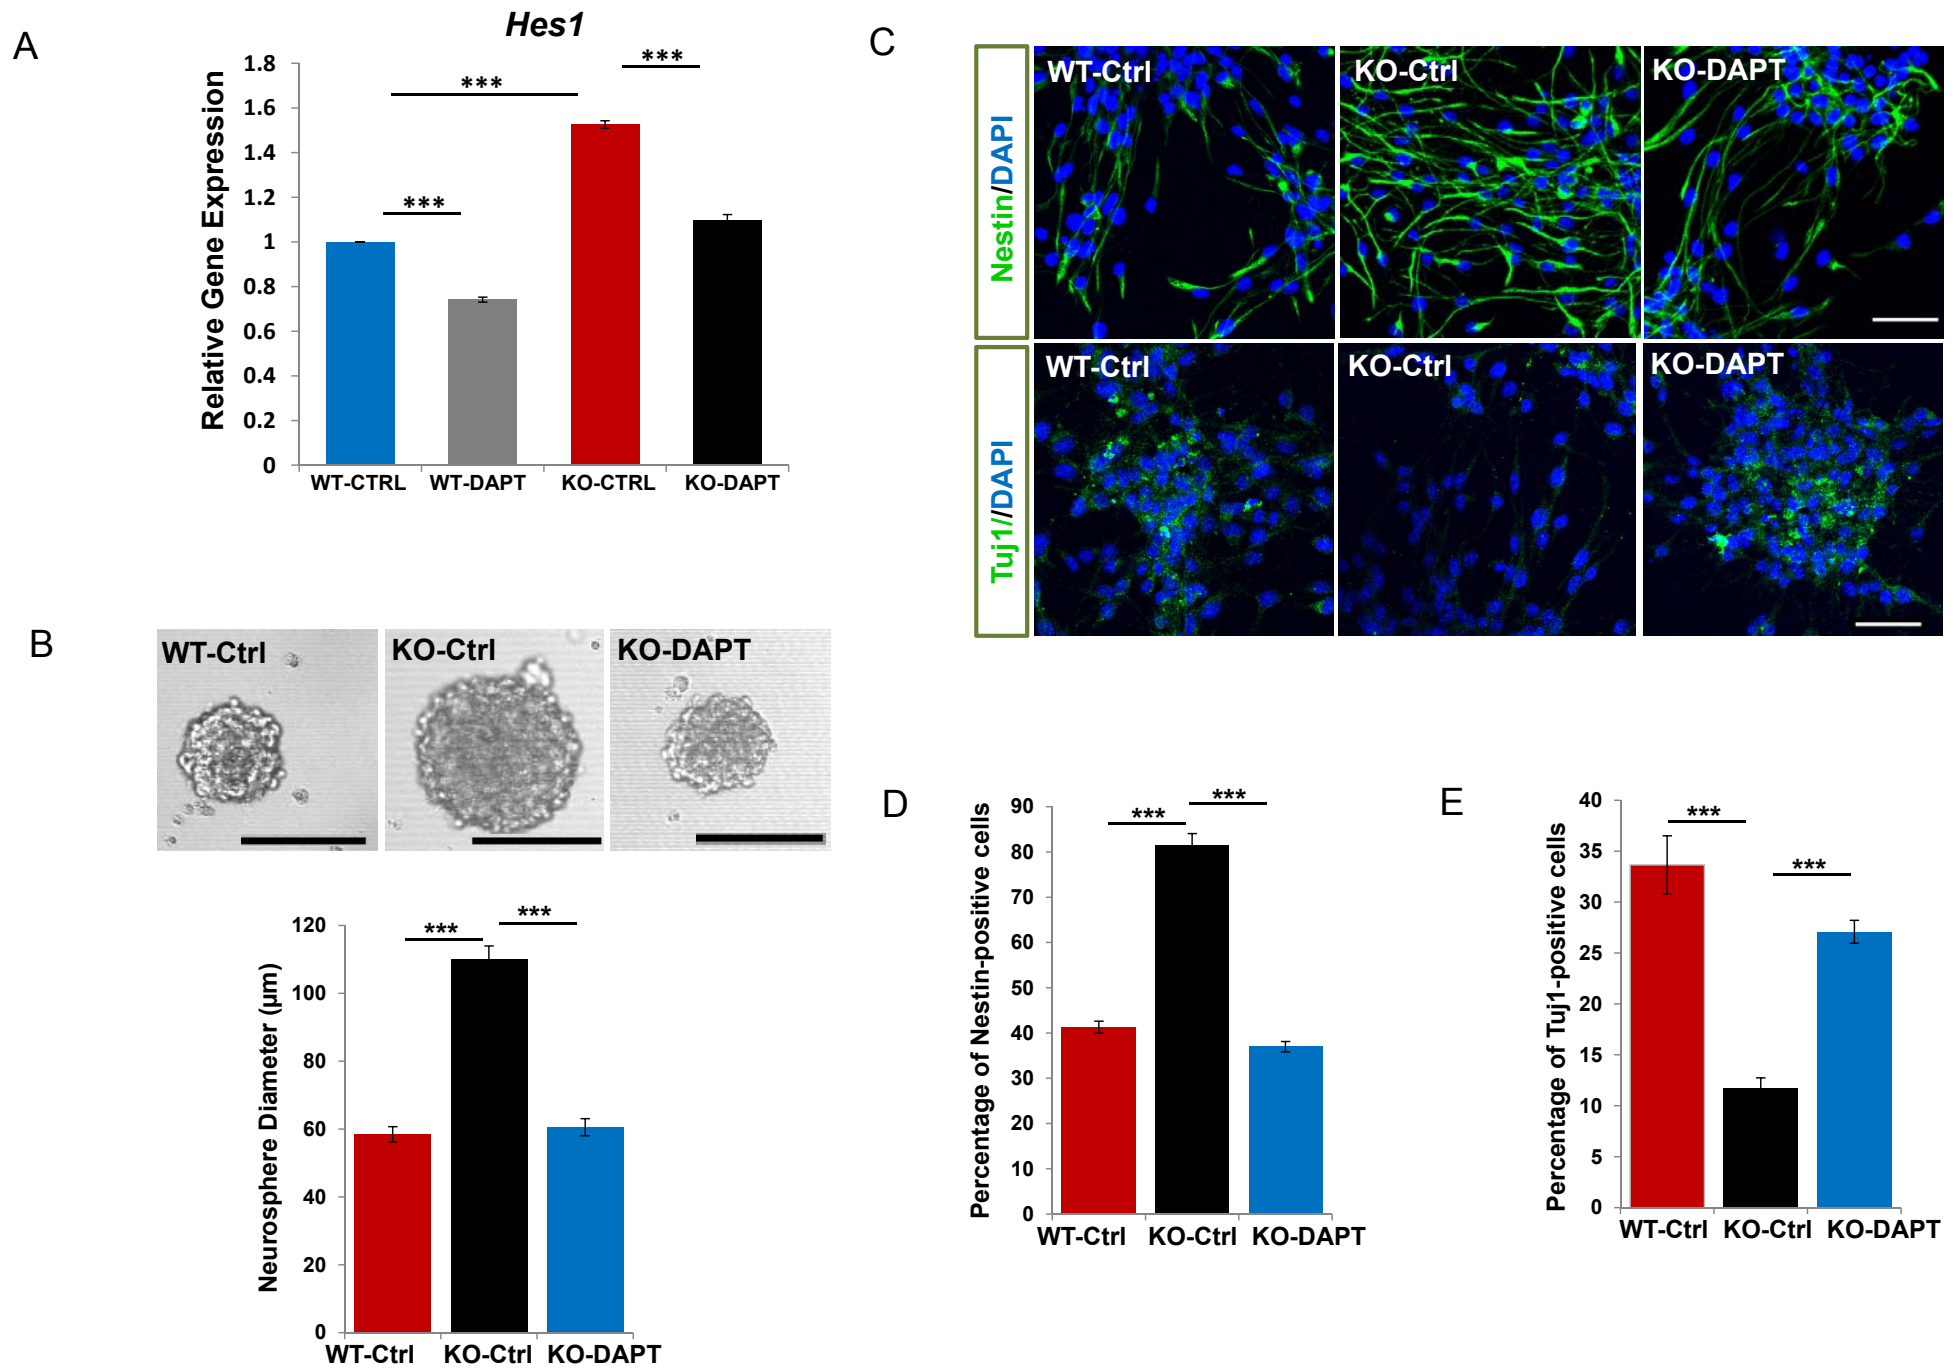

Supplement: supp [file elife-18108-supp-v1.zip]

(Figure 8-figure supplement 3)

**A**

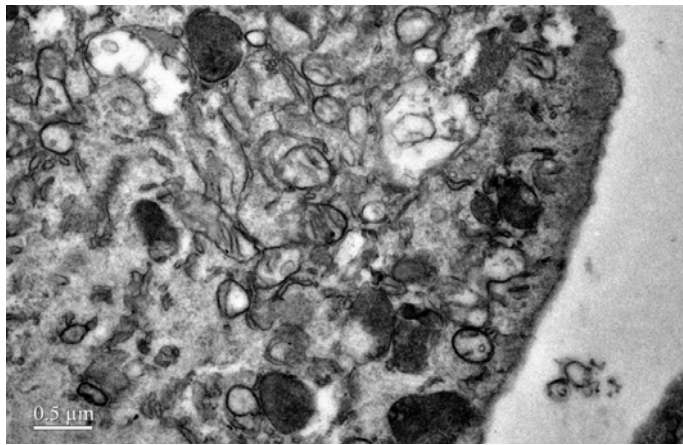

**WT**

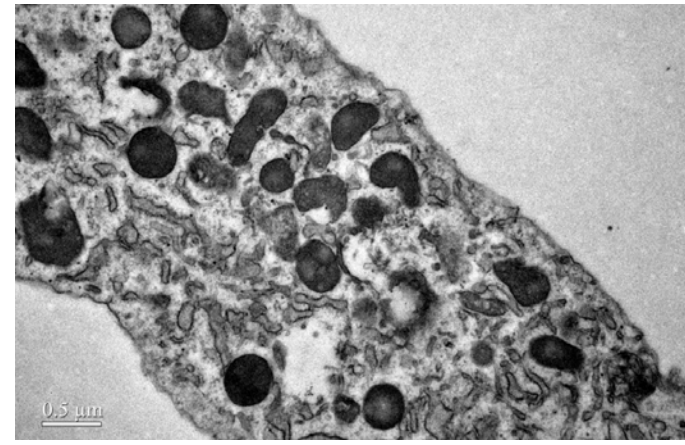

**BLOS2 KO**

**B**

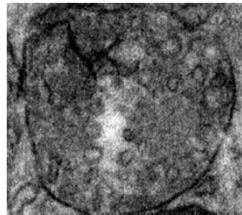

**MVB**

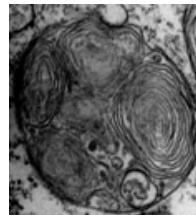

**LE**

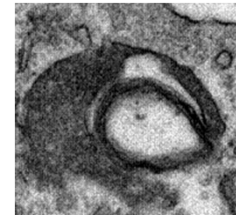

**EL**

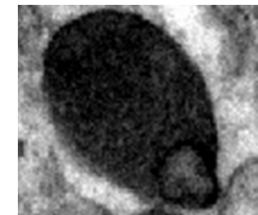

**LYS**

**C**

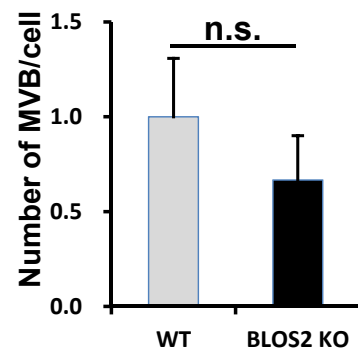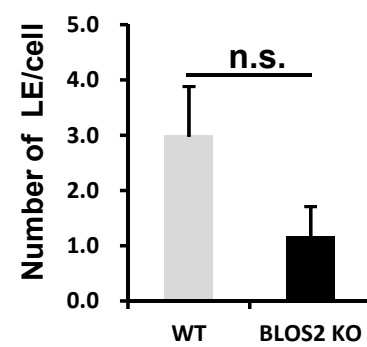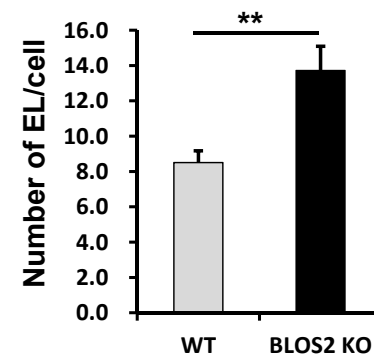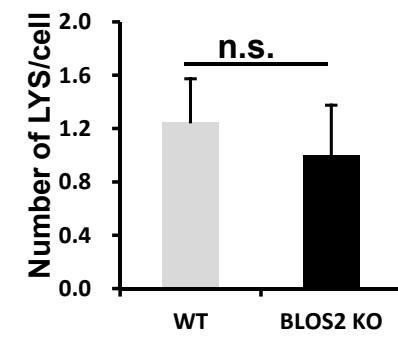

Supplement: supp [file elife-18108-supp-v1.zip]

(Figure 5-figure supplement 3)

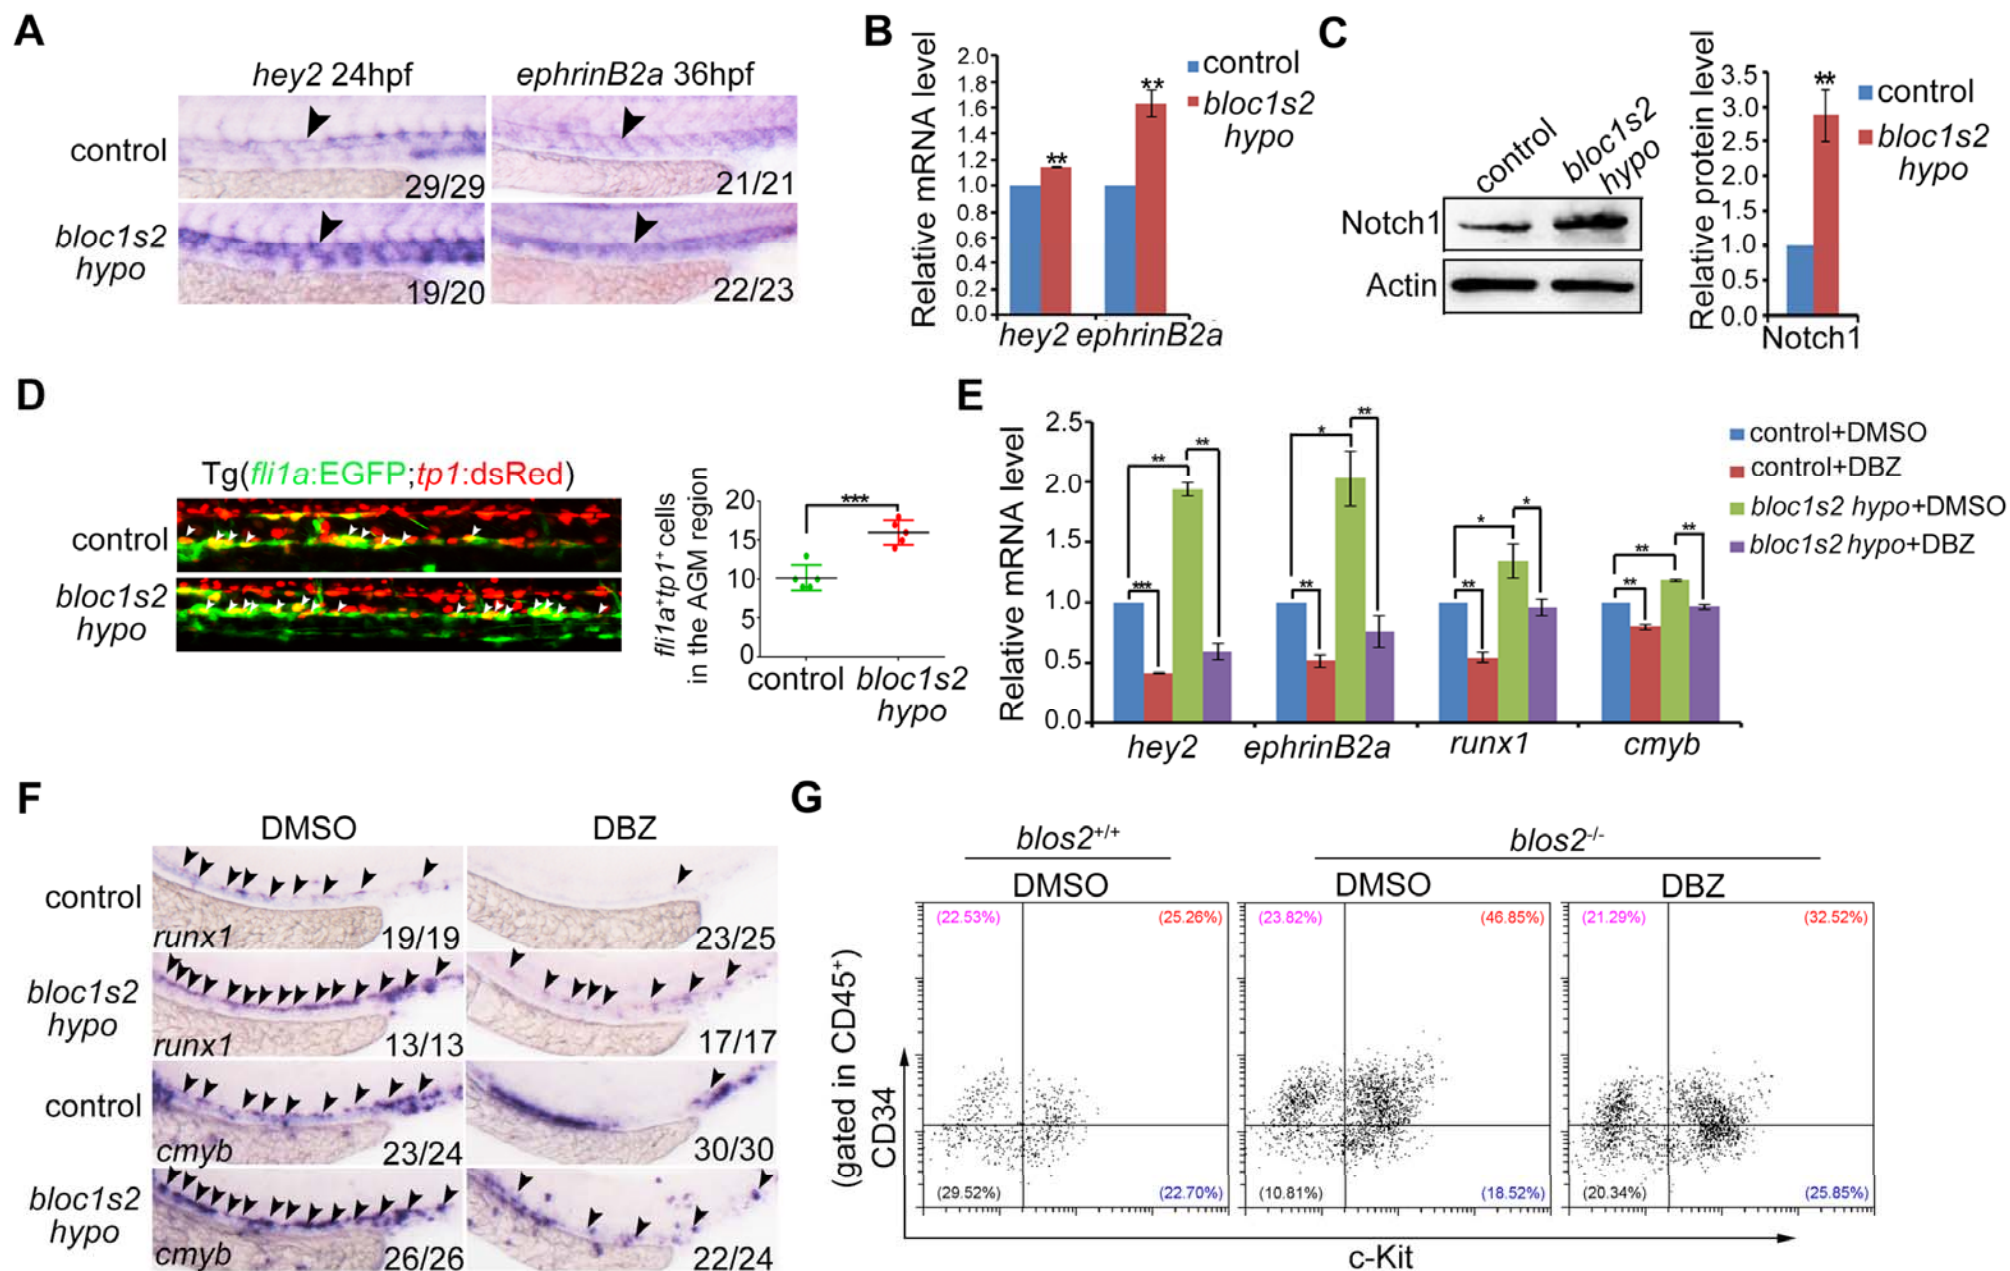

Supplement: supp [file elife-18108-supp-v1.zip]

(Figure 1-figure supplement 1)

**A**

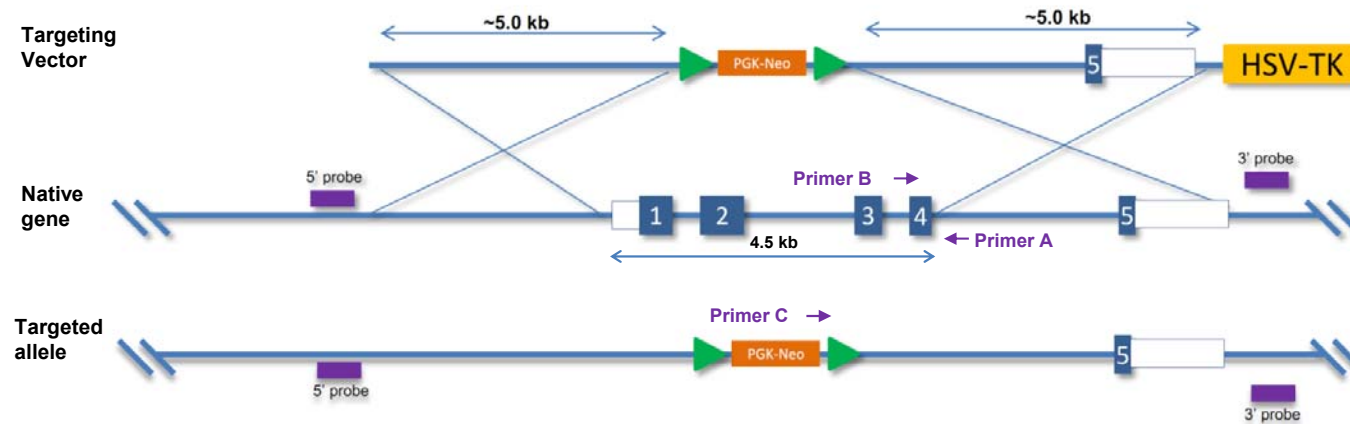

**B**

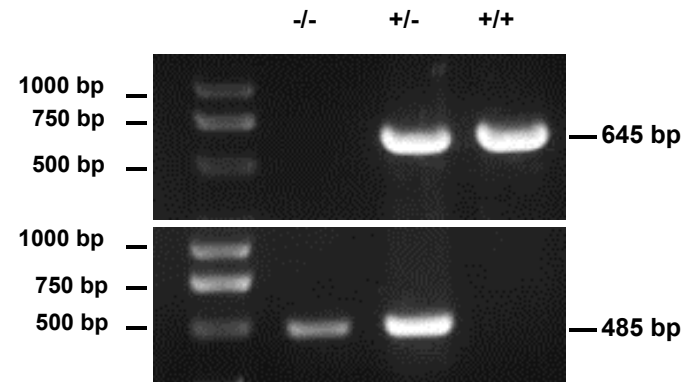

**C**

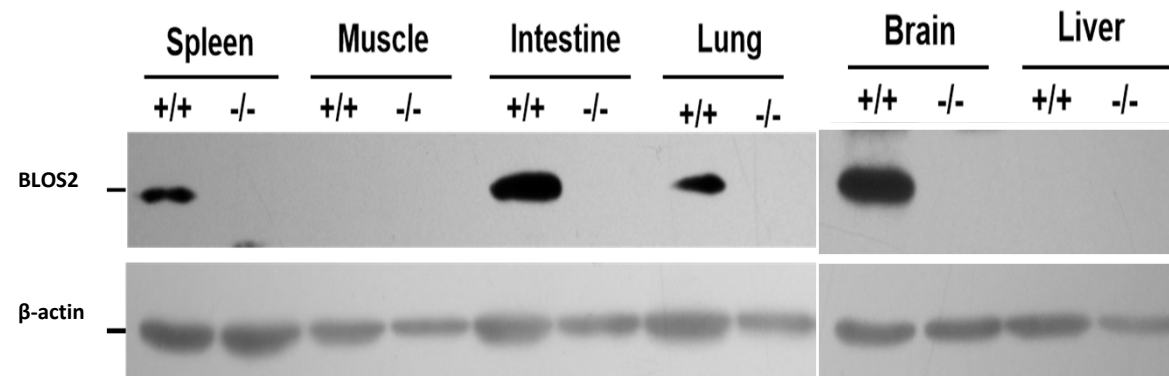

Supplement: supp [file elife-18108-supp-v1.zip]
